1 Genetic diversity of CHC22 clathrin impacts its function in glucose metabolism

2  
3 Matteo Fumagalli <sup>1,2,3,\*</sup>, Stephane M. Camus <sup>2,\*</sup>, Yoan Diekmann <sup>3,\*</sup>, Alice Burke <sup>2</sup>, Marine D.  
4 Camus <sup>2</sup>, Paul J. Norman <sup>4</sup>, Agnel Praveen Joseph <sup>5</sup>, Laurent Abi-Rached <sup>6</sup>, Andrea  
5 Benazzo <sup>7</sup>, Rita Rasteiro <sup>8</sup>, Iain Mathieson <sup>9</sup>, Maya Topf <sup>5</sup>, Peter Parham <sup>10</sup>, Mark G. Thomas  
6 <sup>3</sup>, Frances M. Brodsky <sup>2,5^</sup>

7  
8 <sup>1</sup> Department of Life Sciences, Silwood Park campus, Imperial College London, Ascot SL5  
9 7PY, UK

10 <sup>2</sup> Research Department of Structural and Molecular Biology, Division of Biosciences,  
11 University College London, London WC1E 6BT, UK

12 <sup>3</sup> Research Department of Genetics, Evolution and Environment, Division of Biosciences and  
13 and UCL Genetics Institute, University College London, London WC1E 6BT, UK

14 <sup>4</sup> Division of Personalized Medicine and Department of Immunology, University of Colorado,  
15 Aurora, CO 80045, USA

16 <sup>5</sup> Institute of Structural and Molecular Biology, Birkbeck College and University College  
17 London, UK

18 <sup>6</sup> Equipe ATIP, URMITE UM63 CNRS 7278 IRD 198 INSERM 1095, IHU Méditerranée  
19 Infection, Aix Marseille Université, Marseille, France

20 <sup>7</sup> Department of Life Sciences and Biotechnology, University of Ferrara, Ferrara 44121, Italy

21 <sup>8</sup> School of Biological Sciences, University of Bristol, Bristol BS8 1TQ, UK

22 <sup>9</sup> Department of Genetics, Perelman School of Medicine, University of Pennsylvania,  
23 Philadelphia PA 19104, USA

24 <sup>10</sup> Departments of Structural Biology and Microbiology & Immunology, Stanford University,  
25 Stanford, CA 94305, USA

26  
27 \* these authors contributed equally to this study

28 ^ to whom correspondence should be addressed:

29 Professor Frances M. Brodsky  
30 Division of Biosciences  
31 University College London  
32 Medical Sciences Building (Room 130B)  
33 Gower Street, London WC1E 6BT  
34 Tel: 44 (0)20 3549 5464  
35 Fax:44 (0)20 7679 2682  
36 f.brodsky@ucl.ac.uk

37

38 Short title: Genetic diversity of CHC22 clathrin impacts its function

39

40 List of abbreviations:

41 CCV: clathrin-coated vesicles

42 CHC: clathrin heavy chain

43 CLC: clathrin light chain

44 GLUT4: glucose transporter 4

45 SNP: single nucleotide polymorphism

46 GFP: green fluorescent protein

47 FRAP: fluorescence recovery after photobleaching

48 GSC: GLUT4 storage compartment

49 HA: hemagglutinin

50 FACS: fluorescence-activated cell sorting

51 T2D: Type 2 diabetes

52 AFR: African

53 EUR: European

54 EAS: East Asian

55 AMR: Admixed American

56 SAS: South Asian

57 YRI: Yoruba from Nigeria  
58 CEU: North Americans with Caucasian European ancestry  
59 CHB: Han Chinese from Beijing  
60 MSA: multiple sequence alignment  
61 VCF: variant call format  
62 HG: hunter-gatherer  
63 EF: early farmer  
64 MFI: mean fluorescent intensity  
65  
66  
67  
68  
69  
70  
71  
72  
73  
74  
75  
76  
77  
78  
79  
80  
81  
82  
83  
84

85 **ABSTRACT**

86 CHC22 clathrin plays a key role in intracellular membrane traffic of the insulin-responsive  
87 glucose transporter GLUT4 in humans. We performed population genetic and phylogenetic  
88 analyses of the CHC22-encoding *CLTCL1* gene, revealing independent gene loss in at least  
89 two vertebrate lineages, after arising from gene duplication. All vertebrates retained the  
90 paralogous *CLTC* gene encoding CHC17 clathrin, which mediates endocytosis. For  
91 vertebrates retaining *CLTCL1*, strong evidence for purifying selection supports CHC22  
92 functionality. All human populations maintained two high frequency *CLTCL1* allelic variants,  
93 encoding either methionine or valine at position 1316. Functional studies indicated that  
94 CHC22-V1316, which is more frequent in farming populations than in hunter-gatherers, has  
95 different cellular dynamics than M1316-CHC22 and is less effective at controlling GLUT4  
96 membrane traffic, attenuating its insulin-regulated response. These analyses suggest that  
97 ancestral human dietary change influenced selection of allotypes that affect CHC22's role in  
98 metabolism and have potential to differentially influence the human insulin response.

99

100

101

102

103

104

105

106

107

108

109

110

111

112



113 **INTRODUCTION**

114

115 Clathrin-coated vesicles (CCVs) are key players in eukaryotic intracellular membrane traffic  
116 (Brodsky, 2012). Their characteristic lattice-like coat is self-assembled from cytoplasmic  
117 clathrin proteins, captures membrane-embedded protein cargo and deforms the membrane  
118 into a vesicle. This process enables CCVs to mediate protein transport to and from the  
119 plasma membrane and between organelles. The triskelion-shaped clathrin molecule is  
120 formed from three identical clathrin heavy chain (CHC) subunits. Humans have two genes  
121 (*CLTC* and *CLTCL1*) that respectively encode CHC17 and CHC22 clathrins (Wakeham et  
122 al., 2005). CHC17 clathrin, which has three bound clathrin light chain (CLC) subunits, is  
123 expressed uniformly in all tissues and forms CCVs that control receptor-mediated  
124 endocytosis, as well as lysosome biogenesis and maturation of regulated secretory  
125 granules. These pathways are conventionally associated with clathrin function and are  
126 mediated by clathrin in all eukaryotic cells (Brodsky, 2012). In humans CHC22 clathrin is  
127 most highly expressed in muscle and adipose tissue and forms separate CCVs that are not  
128 involved in endocytosis (Dannhauser et al., 2017). In these tissues, CHC22 CCVs regulate  
129 targeting of the glucose transporter 4 (GLUT4) to an intracellular compartment where it is  
130 sequestered until released to the cell surface in response to insulin (Vassilopoulos et al.,  
131 2009). This insulin-responsive GLUT4 pathway is the dominant mechanism in humans for  
132 clearing blood glucose into muscle and fat tissues after a meal (Shepherd, Kahn, 1999). In  
133 addition to its distinct tissue expression pattern and biological function, CHC22 does not bind  
134 the CLC subunits that associate with CHC17 clathrin, even though the CHC protein  
135 sequences are 85% identical (Dannhauser et al., 2017, Liu et al., 2001). This remarkable  
136 biochemical and functional divergence evolved since the gene duplication event that gave  
137 rise to the two different clathrins during the emergence of chordates (Wakeham et al., 2005).  
138 Notably, however, the *CLTCL1* gene encoding CHC22 evolved into a pseudogene in the  
139 *Mus* genus, although mice maintain an insulin-responsive GLUT4 pathway for clearing blood  
140 glucose. This observation suggests that, despite the importance of the *CLTCL1* gene

141 product, backup pathways have evolved to compensate for loss of the CHC22 protein. To  
142 understand the evolution of the specialized function of CHC22, and the potential selective  
143 processes involved, we here explore the phylogenetic history of the *CLTCL1* gene in  
144 vertebrates and its population genetics in humans, non-human primates and bears.  
145  
146 Ecological shifts create selective forces that filter variation in cellular genes. These include  
147 changes in nutritional conditions (Babbitt et al., 2011), as well as encounters with pathogens  
148 (Fumagalli et al., 2011); both documented as selective forces that affect membrane traffic  
149 genes (Elde, Malik, 2009, Liu et al., 2014). Recent studies of the evolution of genes involved  
150 in membrane traffic have focused on an overview of all eukaryotes with the goals of  
151 establishing the origins of membrane-traffic regulating proteins in the last common  
152 eukaryotic ancestor and defining the species distribution of various families of traffic-  
153 regulating proteins (Rout, Field, 2017, Dacks, Robinson, 2017). These studies have  
154 identified common features of proteins that regulate membrane traffic (Rout, Field, 2017)  
155 and revealed that extensive gene duplication has allowed lineage-specific diversification of  
156 coat proteins and other membrane traffic regulators, such as the Rab GTPases (Diekmann  
157 et al., 2011, Guerrier et al., 2017). Our earlier study of available annotated genomes in 2005  
158 suggested that the gene duplication giving to rise to the two CHC-encoding genes occurred  
159 as a result of one of the whole genome duplications contributing to chordate evolution  
160 (Wakeham et al., 2005). Here we focus on the more recent evolutionary history of these  
161 genes, as well as analyze the increased number of fully annotated vertebrate genomes. We  
162 establish that the *Mus* genus is not unique in post-chordate loss of *CLTCL1*, identifying at  
163 least one additional independent gene loss event in the clade of Cetartiodactyla affecting  
164 pigs, cows, sheep, porpoise, and possibly additional related species. Nonetheless, there is  
165 strong evidence for CHC22 sequence conservation amongst those species that retain  
166 *CLTCL1* (Wakeham et al., 2005). This evolutionarily recent gene loss in some lineages and  
167 retention of the functional form in others suggested that *CLTCL1* may still be under purifying  
168 selection, so we examined *CLTCL1* variation between individuals within vertebrate

169 populations. Comparing populations, we found *CLTCL1* to be considerably more  
170 polymorphic than *CLTC*, which encodes the clathrin found in all eukaryotes, with evidence  
171 for strong ancient purifying selection for CHC17 clathrin function and relaxed purifying  
172 selection on CHC22 function. Additionally, we identified two common allotypes of human  
173 CHC22, which have different functional properties. The derived allele arose in ancient  
174 humans and is more frequent in farming populations when compared to hunter-gatherers.  
175 We previously observed that CHC22 accumulates at sites of GLUT4 retention in the muscle  
176 of insulin-resistant patients with type 2 diabetes (Vassilopoulos et al., 2009) in addition to its  
177 active role in membrane traffic of GLUT4. Thus, CHC22 variation has potential to  
178 differentially affect membrane traffic pathways involved in insulin resistance, as well as alter  
179 normal glucose metabolism within human and other vertebrate populations. The analyses  
180 reported here lead us to propose that variation in the CHC22 clathrin coat may be a  
181 response to changing nutritional pressures both between and within vertebrate species.

182

183

## 184 **RESULTS**

185

### 186 **Phylogenetic analyses reveal selective loss or retention of a functional *CLTCL1* gene** 187 **in vertebrates**

188 Identification of CHC-encoding genes in 62 vertebrate and non-vertebrate species ((Figure  
189 1-figure supplement 1, Figure 1-figure supplement 2) indicates a dynamic history of gene  
190 duplications and losses (Figure 1). The *CLTCL1* gene was detected only in jawed  
191 vertebrates (bony vertebrates and cartilaginous fish), while the two jawless vertebrate  
192 genomes available – lamprey (*Petromyzon marinus*) and hagfish (*Eptatretus burgeri*) – have  
193 only one CHC-encoding gene. This distribution refines the timing of the CHC-encoding gene  
194 duplication to the period after the Agnatha split off the vertebrate lineage, estimated at  
195 493.8MYA (95% HPD: 459.3, 533.8), and before the evolution of jawed vertebrates  
196 450.8MYA (95% HPD: 432.1, 468.1) (Hedges et al., 2015, dos Reis et al., 2015). Of the ten

197 species of bony fish that split off the spotted gar (*Lepisosteus oculatus*) lineage (Amores et  
198 al., 2011), whose genomes are generally tetraploid, all had two versions of *CLTC* and at  
199 least one *CLTCL1* gene, except for cave fish (*Astyanax mexicanus*) apparently lacking  
200 *CLTCL1*. Eight additional species of vertebrates with high genome coverage and reliable  
201 annotation had the *CLTC* gene but no identifiable *CLTCL1* gene. *CLTCL1* genes are present  
202 in the Caviomorpha and Sciuridae rodent suborders, and lost in the Muroidea suborder from  
203 the entire *Mus* genus (Wakeham et al., 2005) and from rat (*Rattus norvegicus*). The  
204 Cetartiodactyla clade also appears to have lost *CLTCL1*, as *CLTCL1* is absent from the four  
205 representative genomes in our dataset (pig (*Sus scrofa*), sheep (*Ovis aries*), cow (*Bos*  
206 *taurus*), Yangtze finless porpoise (*Neophocaena asiaeorientalis*). This suggests a loss  
207 event before the Cetartiodactyla lineage split, independent of the loss event preceding split  
208 of the Muroidea lineage. The absence of *CLTCL1* in rat clarifies why CHC22 could not be  
209 biochemically identified in rat and indicates that antibodies against CHC22 that react with rat  
210 cells must cross-react with other proteins (Towler et al., 2004). *CLTCL1* was also not  
211 detected in the genomes of the little brown bat (*Myotis lucifugus*) and the duck-billed  
212 platypus (*Ornithorhynchus anatinus*). Assuming the genome annotations for the species  
213 analyzed are reliable, these data indicate that there have been at least five independent  
214 losses of *CLTCL1* that are clade- or species-specific. The intermittent loss of *CLTCL1* and  
215 the retention of *CLTC* raises the question of whether their patterns of evolution are typical for  
216 genes with related functions that duplicated in the same time frame.

217  
218 *CLTC* and *CLTCL1* are located on paralogous regions of human chromosomes 17 and 22,  
219 respectively. For these two genes, the evolutionary rates (rate of non-synonymous  
220 substitutions to rate of synonymous substitutions; dN/dS) across vertebrates at each position  
221 were determined and plotted along the length of the protein sequences (Figure 2A-B).  
222 Several adjacent paralogues have been maintained in these chromosomal regions, some of  
223 which are involved in membrane traffic, including the gene pair of *MTMR4* and *MTMR3*,  
224 encoding myotubularin lipid phosphatases. Also, CLC subunits of CHC17 clathrin are

225 encoded by paralogous genes on different chromosomes (*CLTA* and *CLTB*) that arose from  
226 a local gene duplication, mapped to the same time frame as the CHC-encoding duplication  
227 (Wakeham et al., 2005). Comparison of the distribution of dN/dS ratios for the three pairs  
228 revealed stronger purifying selection on the *CLTC/CLTCL1* genes than on *MTMR4/MTMR3*  
229 and *CLTA/CLTB* (Figure 2C-E), suggesting the CHC-encoding clade is more evolutionarily  
230 constrained. This observation is consistent with our previous identification of conserved  
231 signature residues in *CLTCL1* using DIVERGE analysis (Wakeham et al., 2005) and  
232 indicates conserved functions for both the *CLTC* and *CLTCL1* gene products. Furthermore,  
233 there is a striking difference in the distribution and average of evolutionary rates, as  
234 measured by dN/dS, between *CLTC* and *CLTCL1* (Kolmogorov-Smirnov test  $p$ -value < 2.2e-  
235 16), with *CLTC* being significantly more constrained by purifying selection than *CLTCL1*. In  
236 contrast, there is minimal difference in the distribution and average of evolutionary rates  
237 between the two paralog pairs *MTMR4/MTMR3* and *CLTA/CLTB* (Kolmogorov-Smirnov test  
238 yields  $p$ -values 0.003643 and 0.9959, respectively).

239

#### 240 **Human population genetic analyses indicate purifying selection with ongoing** 241 **diversification for *CLTCL1***

242 To follow up the indication that *CLTC* and *CLTCL1* are subject to different degrees of  
243 purifying selection, we investigated their variation in human populations. We analyzed 2,504  
244 genomes from the 1000 Genomes Project database, phase 3 (1000 Genomes Project  
245 Consortium, 2015) and identified alleles resulting from non-synonymous substitutions for  
246 *CLTC* and *CLTCL1*. This dataset included individuals from each of five human meta-  
247 populations: European (EUR, 503), East Asian (EAS, 504), Admixed American (AMR, 347),  
248 South Asian (SAS, 489) and African (AFR, 661). Individual populations with their  
249 abbreviations are listed in Supplementary File 1a. The reference sequences for chimpanzee  
250 (*Pan troglodytes*) and pseudo-references for two archaic humans, Altai Neanderthal and  
251 Denisovan, were also included to relate allelic variation to the ancestral state. A median-  
252 joining network for all the inferred *CLTC* human alleles showed a very common allele

253 (sample frequency 0.997) with only five low-frequency variants generating a total of six  
254 alleles (Figure 3A). Each allele encodes a variant of a CHC (allotype), which includes one or  
255 more single nucleotide polymorphisms (SNPs).

256

257 In contrast to *CLTC*, we identified 46 non-synonymous SNPs in *CLTCL1*, present in 52  
258 distinct haplotypes (referred to here as alleles, following the definition given above,  
259 Supplementary File 2b-c). A median-joining network for the most common *CLTCL1* alleles  
260 showed that they are widely distributed within the human meta-populations (Figure 3B).  
261 Each meta-population tends to have private, less frequent alleles. Nevertheless, all the  
262 meta-populations comprised two main allelic clades, together constituting a sample  
263 frequency of 77%. These two main alleles differ by a single methionine to valine substitution  
264 at position 1316 (M1316V) in the protein sequence (SNP ID rs1061325 with genomic  
265 location chr22:19184095 on hg19 assembly). The valine at position 1316 is predicted to  
266 have a functional effect on the protein since it was categorized as “probably damaging” with  
267 a probability of 0.975 by PolyPhen (Adzhubei et al., 2010) and as “damaging” by SIFT  
268 (Kumar, Henikoff & Ng, 2009). The ancestral sequences from chimpanzee and archaic  
269 humans have the M1316 allotype, suggesting that M1316 is likely to represent the ancestral  
270 state. To further investigate this, we inspected raw sequencing data from both Altai  
271 Neanderthal and Denisovan (Supplementary File 1d). We inferred the most likely genotype  
272 to be homozygous for the M1316 amino acid (minimum sequencing depths equal to 40 and  
273 28, respectively). We then extracted sequencing data for an additional 13 archaic and  
274 ancient humans (Supplementary File 1d). We found that the V1316 amino acid is present in  
275 Pleistocene hunter-gatherers and Neolithic farmers but not in other Neanderthals or  
276 Holocene hunter-gatherers in this limited data set. The equivalent residue in human CHC17  
277 (encoded by *CLTC*) is also methionine, suggesting that methionine at this position likely pre-  
278 dated the initial duplication generating *CLTCL1*. For the non-human species analyzed  
279 (Figure 1), all CHC-encoding genes present would produce clathrins with M1316, further  
280 indicating its ancient and conserved role in CHC structure or function.

281

282 To quantify the levels of nucleotide and allelic diversity for non-synonymous sites within  
283 human populations, several summary statistics of diversity were calculated. For populations  
284 within each meta-population, we separately calculated Watterson's and Nei's estimators of  
285 genetic diversity (TW and PI, respectively), Tajima's D (TD), Fu and Li's D\* (FLDs) and F\*  
286 (FLFs), the sum of squared allele frequencies including the most common allele (H1) and  
287 excluding it (H2), and the normalized ratio between H2 and H1 (H2H1) (Supplementary File  
288 2a). To assess whether observed summary statistics are expected or not under neutral  
289 evolution in each population, we calculated the empirical null distribution from a set of 500  
290 control genes with the same coding length as *CLTCL1* (Supplementary File 2b). High or low  
291 percentile rank values for *CLTCL1* in the empirical distribution indicate that the summary  
292 statistic for *CLTCL1* is unlikely to occur by mutation and neutral genetic drift alone. Summary  
293 statistics and populations were then clustered according to their empirical ranks and plotted  
294 on a heat map (Figure 4).

295

296 All populations tend to display high genetic diversity for *CLTCL1*, as summarized by PI and  
297 TW, and an unusually high frequency for the second most common allele, as summarized by  
298 H2 and H2H1. Such configuration is likely to occur under balancing selection (Charlesworth,  
299 2006) or because of a soft sweep (Messer, Petrov, 2013). That *CLTCL1* was low ranking in  
300 all populations for H1, a statistic representing the frequency of the most common allele, also  
301 supported diversifying selection rather than hard sweeps. On the other hand, all populations  
302 display negative TD values with many populations exhibiting negative FLDs and FLFs  
303 values. These values are consistent with low diversity within common alleles and an excess  
304 of low-frequency variants. Finally, we calculated a measure of genetic differentiation (fixation  
305 index  $F_{ST}$ ) between pairs of canonical reference populations, namely Yoruba from Nigeria  
306 (YRI), North Americans with Caucasian European ancestry (CEU), and Han Chinese from  
307 Beijing (CHB). We did not find any evidence that  $F_{ST}$  values for *CLTCL1* (YRI-CEU 0.15,  
308 YRI-CHB 0.077, CEU-CHB 0.065) are outliers in the empirical distribution of control genes.



309

310 Such inconsistent patterns could be partly explained by the fact that we considered only non-  
311 synonymous changes, and the limited number of SNPs considered per gene may create a  
312 larger variance in the empirical distributions, especially for allele-based statistics. We  
313 therefore sought further evidence for the high frequency of the second most common allele  
314 by investigating whole genomic variation, including silent SNPs. We observed a local  
315 increase of H2 statistics in *CLTCL1* for European populations, which already shows a large  
316 value based on non-synonymous changes (Figure 4-figure supplement 1). This analysis also  
317 indicates that any selection signatures are restricted to a local genomic region  
318 encompassing *CLTCL1*.

319 Another reason for the summary statistics not being strong outliers in the empirical  
320 distribution is the high recombination rate (sex-average rate of 2.5 cM/Mb) inferred for the  
321 genomic region encompassing *CLTCL1* (Kong et al., 2002). We therefore performed  
322 coalescent simulations under neutrality of a putative 100kbp genomic region surrounding the  
323 SNP encoding the M1316V variation, taking into account the local recombination rate and a  
324 previously proposed demographic model for Africans (YRI), Europeans (CEU) and East  
325 Asians (CHB) (Gutenkunst et al., 2009) with a mutation rate of  $1.5 \times 10^{-8}$  per base pair per  
326 generation. The observed values for TW and PI were significantly greater than expected  
327 under neutral evolution for all populations ( $p$ -values  $< 0.001$ ), while TD was greater than  
328 expected for CHB only, although with a marginally non-significant statistical support ( $p$ -value  
329 0.056). All these results are suggestive of a genetic diversity higher than expected under  
330 neutrality for a region encompassing M1316V, although possible complex evolutionary  
331 scenarios may limit the power of summary statistics to detect such selective events.

332

333 One plausible explanation of the high genetic diversity and frequency of the two major alleles  
334 of *CLTCL1* that occur in all modern human populations (Figure 3B, Supplementary File 1b)  
335 is balancing selection (Charlesworth, 2006). Such a distribution of allele frequency was  
336 confirmed using a different data set of more than 50 sampled human populations (Figure 4-



337 figure supplement 2). In several populations, we also observed an apparent excess of  
338 heterozygosity at SNP rs1061325 (Supplementary File 2c), compatible with heterozygote  
339 advantage (overdominance) for the two encoded allotypes differing at residue 1316.  
340 Specifically, all European populations show a ratio of observed versus expected (assuming  
341 Hardy-Weinberg equilibrium) heterozygosity greater than 1, with the highest value of 1.24  
342 (chi-squared test nominal  $p$ -value 0.047) for Iberic Spanish (IBS) (Figure 4-figure  
343 supplement 3). Selective pressures that might be acting on *CLTCL1*, irrespective of  
344 population distribution, could be changes in human diet, a number of which have been  
345 inferred over the last 2.6 million years (Hardy et al., 2015). Perhaps the best known of these  
346 dietary transitions are the introduction of cooking ~450 KYA, development of farming  
347 ~12,500 YA, and more recently industrialized food processing, which gradually and then  
348 dramatically increased carbohydrate availability and consumption by humans. As CHC22  
349 clathrin, the gene product of *CLTCL1*, is required for formation of the intracellular pathway  
350 critical for an insulin response, its genetic history could potentially be influenced by these  
351 changes. To address the hypothesis that nutritional habits conferred selective pressure on  
352 *CLTCL1*, we compared the frequency of SNP rs1061325 (M1316V) in farming versus  
353 hunter-gatherer population samples from ancient and modern humans. Although the  
354 appearance of SNP rs1061325 predates the advent of farming (Supplementary File 1d), the  
355 observed frequencies of this allele, which encodes the CHC22-V1316 allotype, are  
356 consistent with a tendency for it to increase once farming became common practice for a  
357 population (Figure 5), although limited sample size for modern humans will have reduced the  
358 power to reach statistical significance. The highest difference in allele frequency was  
359 observed between early farmers and hunter-gatherers from west Eurasia. However, as these  
360 two populations are highly diverged, it remains possible that this significant difference in  
361 allele frequency is due to genetic drift shaped by population history, rather than natural  
362 selection. To test this model, using the same dataset, we extracted 2,500 control SNPs with  
363 a global minor allele frequency similar to rs1061325 (M1316V) (up to an error of 5%) and  
364 minimum global sequencing depth of 100X. We obtained statistical significance ( $p$ -value

365 0.036) when testing the difference in derived allele frequency in farmers compared to hunter-  
366 gatherers (+26.58%), while we found no statistical support ( $p$ -value 0.080) when testing the  
367 absolute difference in allele frequency between these two populations.

368

### 369 **Genetic variation in non-human vertebrate species supports functional diversification** 370 **of *CLTCL1***

371 We analyzed allelic variation for *CLTC* and *CLTCL1* in the genomes of 79 individuals  
372 representing six species of great ape, two species each for chimpanzees, gorillas and  
373 orangutans (*Pan troglodytes*, *Pan paniscus*, *Gorilla beringei*, *Gorilla gorilla*, *Pongo abellii*,  
374 *Pongo pygmaeus*). After data filtering and haplotype phasing, we found no non-synonymous  
375 SNPs for *CLTC* and 64 putative non-synonymous SNPs for *CLTCL1* (Supplementary File  
376 3a). In three species of great apes analyzed, one of the non-synonymous changes in  
377 *CLTCL1* leads to a premature stop-codon at amino position 41, with an overall frequency of  
378 36%. However, sequences containing the stop-codon exhibited only a marginal increase of  
379 nucleotide diversity (+4.7% as measured by Watterson's index (Watterson, 1975)) compared  
380 to the full-length sequences, suggesting that these are relatively new variants. Notably, for  
381 all the non-human primates analyzed, *CLTCL1* variants do not encode the V1316 allotype,  
382 which appears private to humans. However, in all three types of great ape we found a  
383 common but different substitution, threonine (T1316), at the same amino acid position.

384

385 To further investigate variation in non-human primates, we increased the sample size per  
386 species by analyzing *CLTC* and *CLTCL1* variation in 70 chimpanzee and bonobo genomes,  
387 including four subspecies of chimpanzee. While no variation was observed for *CLTC* (Figure  
388 3C), a median-joining network for the inferred 8 *CLTCL1* alleles (Supplementary File 3b)  
389 showed a major allele common to different species and subspecies with less frequent alleles  
390 primarily restricted to individual ones (Figure 3D). In this chimpanzee data set, we observed  
391 considerable diversity, with a potential tendency towards multiple variants. However, amino  
392 acid 1316 was not covered in this data set, possibly due to poor data mapping quality

393 associated with the high nucleotide diversity observed. In another data set of 20 individuals  
394 (Teixeira et al., 2015), we found a frequency of 10% for the T1316 allotype in chimpanzees  
395 but not in bonobos.

396

397 We further investigated *CLTCL1* variation in polar bears (*Ursus maritimus*) and their closest  
398 related species, brown bears (*Ursus arctos*). These two species, which diverged 479-343  
399 KYA (Liu et al., 2014), have very different diets (Liu et al., 2014, Bojarska, Selva, 2012) and  
400 are phylogenetically closer to each other than chimpanzees and humans. Polar bears  
401 subsist on a high fat, low carbohydrate diet, whereas brown bears consume a more varied  
402 diet of carbohydrate, protein and fat. Analysis of 21 bear genomes (7 polar bears and 14  
403 brown bears) (Benazzo et al., 2017), revealed three positions (1267, 1389, and 1522) which  
404 are fixed in polar bears but are either polymorphic or have a different residue in brown bears  
405 (Supplementary File 3c). Genetic differentiation between polar and brown bears, as  
406 measured by  $F_{ST}$ , is markedly higher for *CLTCL1* (0.56) than for *CLTC* (0.26) (Liu et al.,  
407 2014). Furthermore, a phylogenetic tree of both bear species in our sample exhibits more  
408 diversification for *CLTCL1* compared to *CLTC* (Figure 3-figure supplement 1). This sample of  
409 bear populations may support the emergence of multiple *CLTCL1* variants within a species  
410 and a potential role for diet-related selection.

411

#### 412 **Modeling CHC22 variation based on *CLTCL1* polymorphism suggests an effect on** 413 **clathrin lattice contacts**

414 One expectation for selection of the human-specific *CLTCL1* allele encoding the CHC22-  
415 V1316 allotype is that this amino acid change might confer a functional change in the clathrin  
416 lattice. This was predicted by the PolyPhen and SIFT analyses, highlighting the change as  
417 potentially structure-altering. As many humans are heterozygous for the M1316 and V1316  
418 allotypes (44% based on all individuals from 1000 Genomes project), there may potentially  
419 be special properties for mixed lattices formed from the two protein allotypes. To address the  
420 possibility that the M1316V polymorphism affects protein function, we used MODELLER

421 (Benjamin, Sali, 2014) to produce a homology model of the two CHC22 allotypes based on  
422 the crystal structure of CHC17 clathrin (PDB 1B89), taking advantage of the 85% protein  
423 sequence identity between human CHC17 and CHC22 (Figure 6). Modeling using UCSF  
424 Chimera (Pettersen et al., 2004) showed that residue 1316 is found at a key interface  
425 between triskelion legs in assembled clathrin (Figure 6A and top of panel B). If M1316 is  
426 substituted by V1316, the smaller side chain creates a void that would be energetically  
427 unfavorable (Figure 6, bottom of panel B), such that the triskelion leg might twist slightly to  
428 close the void. In the clathrin lattice, the legs have a torque that rotates the assembly  
429 interface along the protein sequence (Wilbur, Hwang & Brodsky, 2005), so a further twist  
430 could slightly adjust the interface, altering assembly interactions. Changes in the assembly  
431 interface could affect integrity of the lattice and potentially influence kinetics of assembly and  
432 disassembly. Mixed lattices of the two CHC22 allotypes would therefore have different  
433 properties from CHC22 coats formed in homozygotes for the two major *CLTCL1* alleles.  
434 CHC22 is needed for the traffic of GLUT4 to its intracellular storage compartment, where  
435 GLUT4 awaits release to the plasma membrane in response to insulin. However, CHC22  
436 also accumulates at the GLUT4 storage compartment (GSC) when it expands due to  
437 impaired GLUT4 release in cases of insulin-resistant type 2 diabetes (T2D) (Vassilopoulos et  
438 al., 2009). Thus, genetic variation of CHC22 could alter rates of retention and release of  
439 GLUT4 in both healthy and disease states.

440

#### 441 **CHC22 variants display functional differences**

442 To test whether the evolutionary change from M1316 to V1316 in CHC22 clathrin alters its  
443 properties, three aspects of CHC22 biochemistry and function were compared for the two  
444 allotypes. HeLa cells were transfected with constructs encoding each CHC22 variant or  
445 CHC17, tagged with green fluorescent protein (GFP). Atypically for their epithelial cell origin  
446 but not for transformed cells, HeLa cells express CHC22 clathrin (they are homozygous for  
447 the M1316 allotype) (Adey et al., 2013, Landry et al., 2013). We observed that the  
448 transfected fluorescently tagged CHC22 allotypes were both concentrated in the perinuclear

449 region of the cell, similar to endogenous CHC22-M1316 detected by antibody, and did not  
450 overlap with endogenous CHC17 (Figure 7A). Conversely, transfected GFP-CHC17 did not  
451 overlap with endogenous CHC22, so expression of the transfected CHCs reflected their  
452 natural distribution (Dannhauser et al., 2017). Using these constructs, the dynamics of  
453 membrane association for the two allotypes of CHC22 and for CHC17 was assessed by  
454 Fluorescence Recovery After Photobleaching (FRAP). To assess clathrin turnover, as an  
455 indicator of clathrin coat stability, cells expressing fluorescent proteins were photobleached  
456 in the perinuclear area (Figure 7B) and their rate of fluorescence recovery was measured.  
457 Recovery of CHC17 fluorescence was the fastest, consistent with its more soluble properties  
458 compared to CHC22 (Dannhauser et al., 2017). CHC22-M1316 showed the slowest  
459 recovery and CHC22-V1316 was intermediate (Figure 7C-E), suggesting that it is more  
460 exchangeable in the CHC22 coat than the M1316 allotype.

461

462 The impact of CHC22 variation on GLUT4 retention was then assessed. Because HeLa cells  
463 express CHC22, they can form a GSC, when transfected to express GLUT4. These cells  
464 sequester GLUT4 intracellularly, and then release it to the plasma membrane in response to  
465 insulin, behaving like muscle and adipocytes, though with more modest insulin response  
466 (Camus et al., 2018, Trefely et al., 2015, Haga, Ishii & Suzuki, 2011). To detect GLUT4  
467 release to the cell surface, we used a construct expressing GLUT4 tagged with mCherry and  
468 a hemagglutinin (HA) epitope embedded in an exofacial loop of the transporter (HA-GLUT4-  
469 mCherry). Appearance of surface GLUT4 in response to insulin was detected by  
470 fluorescence-activated cell sorting (FACS) using an antibody to the HA epitope (Figure 8A).  
471 Transfection of HeLa cells with siRNA depleting CHC22 ablates this insulin-responsive  
472 pathway (Camus et al., 2018) (Figure 8A). We then assessed if siRNA inhibition of insulin-  
473 responsive GLUT4 release can be rescued by expression of CHC22-M1316-GFP or CHC22-  
474 V1316-GFP. These constructs, the same as characterized in Figure 7A, are siRNA-resistant,  
475 as well as being GFP-tagged. We observed that, when endogenous CHC22 was depleted,  
476 CHC22-M1316 was able to restore the insulin response but CHC22-V1316 was not, when

477 the rescue constructs were expressed at the same levels in cells (measured by intensity of  
478 GFP fluorescence) (Figure 8A). CHC17 expression also did not rescue insulin-induced  
479 GLUT4 expression, as shown previously (Vassilopoulos et al., 2009). However, CHC22-  
480 V1316 is functional for trapping GLUT4 intracellularly because CHC22-transgenic mice that  
481 express CHC22-V1316 in muscle, using the natural human promoter, show excessive  
482 GLUT4 sequestration in muscle compared to wild-type mice without CHC22, leading to  
483 higher blood glucose in the transgenic animals (Vassilopoulos et al., 2009). To analyze  
484 GLUT4 sequestration in another way, cells depleted for CHC22 and then transfected with  
485 mCherry-GLUT4 plus either CHC22 allotype or CHC17 were each divided into three  
486 populations expressing equivalently low, medium and high levels of the transfected CHC-  
487 GFP. Then, the total GLUT4 content of the cells was measured by mCherry fluorescence.  
488 We observed higher levels of GLUT4 in cells expressing CHC22-M1316-GFP, compared to  
489 cells expressing either CHC22-V1316-GFP or CHC17-GFP at both medium and high levels  
490 of CHC expression (Figure 8B). This suggests that GLUT4 is sequestered more effectively  
491 from degradative membrane traffic pathways when trafficked by CHC22-M1316 than by  
492 CHC22-V1316, indicating that the M1316 variant is more efficient at targeting GLUT4 to the  
493 GSC. As indicated by their weak insulin response compared to muscle or fat cells, HeLa  
494 cells are only just able to form a functional GSC from which GLUT4 can be released. For  
495 these cells, the less effective CHC22-V1316 is inadequate to restore GSC formation when  
496 their endogenous CHC22-M1316 is depleted. Use of this HeLa model was necessitated by  
497 the lack of natural models for the CHC22-dependent GLUT4 pathway in myoblasts and  
498 adipocytes, as well as a lack of antibodies that detect surface GLUT4. Nonetheless, these  
499 experiments demonstrate a functional difference between CHC22-M1316 and CHC22-  
500 V1316 and suggest that CHC22-V1316 is less efficient at GLUT4 sequestration.

501

## 502 **DISCUSSION**

503

504 We studied the phylogenetics and population genetics of CHC22 clathrin to understand the  
505 functional variation of this protein in relation to its evolutionary history. CHC22 clathrin is a  
506 key player in post-prandial blood glucose clearance in humans through its role in intracellular  
507 packaging of the GLUT4 glucose transporter in muscle and fat, the tissues in which CHC22  
508 and GLUT4 are expressed (Vassilopoulos et al., 2009). The CHC22 pathway positions  
509 GLUT4 for cell surface release in response to insulin and consequent uptake of glucose into  
510 these tissues (Bryant, Govers & James, 2002). The *CLTCL1* gene encoding CHC22 resulted  
511 from gene duplication that we have now dated to 494-451 MYA, early in vertebrate evolution  
512 when jawed vertebrates emerged. We had previously shown that *CLTCL1* is a pseudogene  
513 in mice (Wakeham et al., 2005). Expanding analysis to 58 vertebrate genomes (>5X  
514 coverage) we could not detect *CLTCL1* in nine vertebrate genomes. Six of these absences  
515 can be ascribed to two independent gene loss events in branches of the Rodentia and the  
516 Cetartidactylae. The three others may represent additional gene losses or incomplete  
517 genome annotation. All vertebrate and non-vertebrate eukaryotes considered here have  
518 retained the parent *CLTC* gene encoding CHC17 clathrin, which mediates endocytosis and  
519 other housekeeping membrane traffic pathways. The analysis described here establishes  
520 that *CLTC* is under strong purifying selection. Notable is our evidence for purifying selection  
521 on *CLTCL1* in the species in which it has been retained, supporting its functional importance  
522 in those species. Compared to *CLTC*, extensive allelic diversity was observed for *CLTCL1* in  
523 all species for which populations were analyzed, including humans, chimpanzees and bears.  
524 Variant alleles were species-specific in most cases. In all human populations, two allelic  
525 variants of *CLTCL1* are present in high frequency, differing only at one nucleotide, resulting  
526 in CHC22 protein with either methionine or valine at position 1316. The V1316 allotype  
527 appears specific to humans, but some non-human primates have a different variation at the  
528 position 1316. Analysis of ancient humans dated the appearance of the V1316 variant to  
529 500-50 KYA and indicated that M1316, which is fixed in CHC17 clathrin, is the ancestral  
530 state. Analyses of human population genetic data provided support for the maintenance of  
531 high genetic diversity and two allotypes of CHC22. We hypothesize that selective pressure



532 on CHC22 clathrin comes from its role in nutrient metabolism. Consistent with this  
533 hypothesis, we observed functional differences between the two CHC22 allotypes in their  
534 capacity to control GLUT4 membrane traffic, as predicted by structural modeling and  
535 differences in cellular dynamics of the two allotypes.

536

537 Retention of *CLTC* in all vertebrate species is consistent with the encoded CHC17 mediating  
538 cellular housekeeping clathrin functions shared by all eukaryotes. On the other hand,  
539 CHC22, encoded by the paralogous gene *CLTCL1*, operates in the specialized insulin-  
540 responsive GLUT4 pathway to make the pathway more efficient in those species that  
541 retained *CLTCL1*. Data presented here (Figure 8) and our recent mapping of a novel  
542 intracellular location for CHC22 function (Camus et al., 2018) indicate that, in human cells,  
543 CHC22 clathrin promotes transport from the secretory pathway to the insulin-responsive  
544 GSC. This CHC22 pathway complements the endocytic pathway for GLUT4 targeting to the  
545 GSC, so species without CHC22 can rely primarily on endocytosis for GLUT4 trafficking to  
546 the GSC, while species with CHC22 use both pathways. Thus, we hypothesize that species  
547 with functional CHC22 clathrin are more efficient at intracellular GLUT4 sequestration,  
548 resulting in lower surface GLUT4 in the absence of insulin, and tighter regulation of GLUT4  
549 release in response to insulin. The trade-off is that these species have an inherent increased  
550 tendency to insulin resistance as their GLUT4 is sequestered more effectively. The two main  
551 vertebrate branches that have lost CHC22 comprise the Muridae (mice and rats) who are  
552 incessant herbivores and the Cetartiodactyla (sheep, cattle, porpoise and pigs) which  
553 include the ruminants (sheep and cattle) whose muscle uptake of glucose is critical for  
554 muscle function, but is not a main pathway for glucose clearance (Hocquette et al., 1995).  
555 These two groups of species require greater availability of GLUT4 on their cell surfaces, so  
556 that more efficient GLUT4 sequestration by CHC22 would not be favorable to their nutritional  
557 needs. The fact that CHC22 alters the balance of membrane traffic to the GSC means that  
558 species losing *CLTCL1* could evolve compensatory pathways more compatible with their  
559 diets. Thus, transgenic mice expressing CHC22 over-sequester GLUT4 in their muscle and



560 develop hyperglycemia with aging (Vassilopoulos et al., 2009). The blind cave fish, which  
561 appears to lack *CLTCL1*, has independently evolved mutations in the insulin receptor,  
562 creating natural insulin resistance, such that the presence of CHC22 on top of this  
563 mechanism might be detrimental (Riddle et al., 2018). The loss of *CLTCL1* from blind cave  
564 fish is consistent with the insulin responsive GLUT4 pathway being a target for natural  
565 selection driven by diet, which might also explain *CLTCL1* variation or loss for additional  
566 vertebrate species during vertebrate evolution.

567

568 The allelic variation reported here for *CLTCL1* in human and bear populations further  
569 supports the hypothesis that *CLTCL1* has undergone continued selection during vertebrate  
570 evolution in relation to diet. While purifying selection appears to be operating on *CLTCL1* in  
571 those species that retain it, *CLTCL1* is far more variable than *CLTC* in these species. In  
572 humans, we find two major and functionally distinct alleles at remarkably similar frequencies  
573 in all populations studied. Statistical analysis comparing early farmer and hunter-gatherer  
574 populations shows an apparent increase of the V1316 variant, suggesting a correlation with  
575 regular consumption of digestible carbohydrate. Notably, the SNP distinguishing these  
576 alleles is human-specific and likely arose 550-50 KYA (i.e. post-Neanderthal, pre-Neolithic).  
577 Other dramatic increases in digestible carbohydrate utilization have been inferred for  
578 humans in this timeframe; in particular the advent of cooking (which gelatinizes crystallized  
579 starch, making it much easier to digest), salivary amylase gene copy number increase  
580 (allowing increased starch digestion capacity) and accelerated brain size increase (which  
581 would increase demands for blood glucose) (Hardy et al., 2015). While the co-evolution of  
582 these cultural and genetic traits was originally proposed to have occurred some 800 KYA,  
583 recent studies indicate a time frame of 450-300 KYA years for cooking (Shahack-Gross et  
584 al., 2014), increased oral amylase activity (Inchley et al., 2016) and accelerated brain size  
585 increase (Dunbar, 2019). The fact that the two major human *CLTCL1* alleles are functionally  
586 distinct is consistent with diversifying selection operating on *CLTCL1*, with a balancing  
587 selection possibly caused by heterozygote advantage. While population genetic signatures

588 for balancing or overdominant selection were not entirely robust, some summary statistics  
589 were suggestive of an increased diversity that was unlikely to have occurred under  
590 neutrality. Other statistics, such as the ones based on allele frequencies, would not be  
591 expected to gain significance within the timeframe of the human-specific diversifying  
592 selection we detect. The allelic diversity of *CLTCL1* in other primate species could have the  
593 potential effect of diluting its function. Whilst chimpanzees are omnivores and gorillas  
594 herbivores, both rely for nutrition on extensive foraging for carbohydrate. Also notable is that  
595 polar bears, who have a very low carbohydrate diet compared to their brown bear relatives,  
596 have distinct CHC22 variants with unknown functionality, again consistent with *CLTCL1*  
597 undergoing selection driven by nutritional ecology.

598

599 Clathrins are self-assembling proteins and function as a latticed network in the protein coat  
600 that they form on transport vesicles. Our structural modeling predicts that the single amino  
601 acid difference between the two main human CHC22 allotypes could influence the strength  
602 of molecular interactions in the CHC22 clathrin lattice, as position 1316 occurs at a lattice  
603 assembly interface (Figure 6). When expressed in cells, both CHC22 variants gave the same  
604 overall intracellular distribution, but CHC22-V1316 shows faster turnover from membranes  
605 than CHC22-M1316 (Figure 7) and is less effective at GLUT4 sequestration (Figure 8B).  
606 These properties are consistent with the methionine to valine change attenuating GLUT4  
607 retention. This interpretation is further supported by a GLUT4 translocation assay, which  
608 indicates that the V1316 variant is less effective in forming the insulin-responsive GSC than  
609 the ancestral M1316 form of CHC22 (Figure 8A). Thus, mixed lattices occurring in  
610 heterozygous individuals, potentially reflect balancing selection and overdominance, might  
611 reduce GLUT4 sequestration compared to M1316 homozygotes. This would have the effect  
612 of improving glucose clearance. It can be argued that human consumption of digestible  
613 carbohydrate on a regular basis (Hardy et al., 2015), requiring increased glucose clearance,  
614 might be a selective force driving this genetic adaptation. This view is consistent with the  
615 increased frequency of the V1316 variant in early farmers. It is also possible that some forms

616 of polar bear CHC22 are super-active at GLUT4 sequestration, providing a route to maintain  
617 high blood glucose, as occurs through other mutations in the blind cave fish (Riddle et al.,  
618 2018).

619

620 Regulators of fundamental membrane traffic pathways have diversified through gene  
621 duplication in many species over the timespan of eukaryotic evolution. Retention and loss  
622 can, in some cases, be correlated with special requirements resulting from species  
623 differentiation, such as the extensive elaboration of genes in the secretory pathway of  
624 *Tetrahymena* (Dacks, Robinson, 2017, Bright et al., 2010). The evolutionary history of  
625 *CLTCL1*, following vertebrate-specific gene duplication, suggests that differentiation of  
626 nutritional habits has shaped selection for the presence and absence of *CLTCL1* in some  
627 vertebrate species, and its diversification in humans and potentially other species. Though  
628 its highest expression is in muscle and adipose tissue, transient expression of CHC22 during  
629 human brain development has also been documented (Nahorski et al., 2015). This was  
630 noted in a study of a very rare null mutant of *CLTCL1* that caused loss of pain sensing in  
631 homozygotes and no symptoms for heterozygotes (Nahorski et al., 2015). Attenuated  
632 CHC22 function of the V1316 variant might lead to a spectrum of pain-sensing in humans  
633 but this is unlikely to be a strong selective force affecting reproductive success, whereas  
634 glucose homeostasis, as suggested by our analysis, is more likely. By exerting efficient  
635 control of blood glucose levels, the presence of CHC22 clathrin was likely beneficial in  
636 providing the nutrition required to develop the large human brain, as well as affecting  
637 reproduction by influencing glucose availability during pregnancy (Hardy et al., 2015).  
638 However, over the last 12,500 years in association with farming, or perhaps over the last  
639 450,000 years in association with cooking, salivary amylase activity and starch digestion  
640 (Hardy et al., 2015, Shahack-Gross et al., 2014, Inchley et al., 2016), readily available  
641 carbohydrate has increased our need to clear glucose from the blood, such that selection  
642 continues to act on *CLTCL1* in humans. Our cell biology studies have also demonstrated  
643 that CHC22 increases GLUT4 retention. While we would not expect the major *CLTCL1*

644 polymorphism to directly influence the development of T2D, CHC22 accumulates on the  
 645 expanded GSC that forms in cases of insulin-resistant T2D (Vassilopoulos et al., 2009), so  
 646 its variation could potentially exacerbate insulin resistance to different degrees. The genetic  
 647 diversity that we report here may reflect evolution towards reversing a human tendency to  
 648 insulin resistance and have relevance to coping with increased carbohydrate in modern  
 649 diets.

650

## 651 MATERIAL AND METHODS

652

### 653 Key resources table

654

| Reagent type (species) or resource | Designation                                            | Source or reference                  | Identifiers                             | Additional information |
|------------------------------------|--------------------------------------------------------|--------------------------------------|-----------------------------------------|------------------------|
| Cell line (human)                  | HeLa                                                   | ATCC                                 | Cat. #: CCL-2;<br>RRID:CVCL_0030        |                        |
| Antibody                           | Mouse monoclonal anti-CHC17 (X22)                      | Frances Brodsky<br>PMID:<br>2415533  |                                         | IF (5 mg/mL)           |
| Antibody                           | Mouse monoclonal anti-CHC17 (TD.1)                     | Frances Brodsky<br>PMID:<br>1547490  |                                         | WB (1.3 mg/mL)         |
| Antibody                           | Rabbit polyclonal anti-CHC22 (SHL-KS)                  | Frances Brodsky<br>PMID:<br>29097553 |                                         | WB (0.4 mg/mL)         |
| Antibody                           | Mouse monoclonal anti-b-actin (AC-15)                  | Sigma                                | Cat. #: A1978;<br>RRID:AB_476692        | WB (1:2000)            |
| Antibody                           | Purified anti-HA.11 (16B12)                            | Covance                              | Cat. #: MMS-101P;<br>RRID:AB_10064068   |                        |
| Antibody                           | Rabbit polyclonal anti-CHC22                           | Proteintech                          | Cat. #: 22283-1-AP;<br>RRID:AB_11183764 |                        |
| Antibody                           | Goat anti-rabbit IgG coupled to HRP                    | ThermoFisher Scientific              | Cat. #: 172-1019                        | WB (1:8000)            |
| Antibody                           | Goat anti-mouse IgG coupled to HRP                     | ThermoFisher Scientific              | Cat. #: 170-6516                        | WB (1:8000)            |
| Antibody                           | Anti-mouse IgG1 coupled to Brilliant Violet 421 (RMG1- | Biolegend                            | Cat. #: 406616;<br>RRID:AB_2562234      | FC (1:200)             |

|                         |                                             |                                   |                    |                                                                       |
|-------------------------|---------------------------------------------|-----------------------------------|--------------------|-----------------------------------------------------------------------|
|                         | 1)                                          |                                   |                    |                                                                       |
| Recombinant DNA reagent | HA-GLUT4-mCherry                            | This paper                        |                    | Generated from HA-GLUT4-GFP (gift from Dr Tim McGraw, PMID: 11058093) |
| Recombinant DNA reagent | CHC22V (pEGFP-C1-GFP-CHC22V)                | Frances Brodsky<br>PMID: 20065094 |                    |                                                                       |
| Recombinant DNA reagent | CHC22M (pEGFP-C1-GFP-CHC22M)                | This paper                        |                    | Generated by Quick change mutagenesis from CHC22V                     |
| Recombinant DNA reagent | CHC17 (pEGFP-C1-GFP-CHC17)                  | Frances Brodsky<br>PMID: 29097553 |                    |                                                                       |
| Sequence-based reagent  | AllStars Negative Control siRNA             | Qiagen                            | Cat. #: SI03650318 |                                                                       |
| Commercial assay or kit | Quick change mutagenesis                    | New England Biolabs, USA          | Cat. #: E0554S     |                                                                       |
| Commercial assay or kit | BCA                                         | Pierce                            | Cat. #: 23225      |                                                                       |
| Commercial assay or kit | Western Lightning Chemiluminescence Reagent | GE Healthcare                     | Cat. #: RPN2209    |                                                                       |
| Chemical compound, drug | JetPrime transfection reagent               | PolyPlus                          | Cat. #: 114-07     |                                                                       |
| Chemical compound, drug | Insulin                                     | Sigma                             | Cat. #: I9278      |                                                                       |
| Chemical compound, drug | Bovine serum albumin (BSA)                  | Sigma                             | Cat. #: A7906      |                                                                       |
| Software, algorithm     | FlowJo                                      | Treestar                          |                    |                                                                       |
| Software, algorithm     | ImageJ                                      | NIH                               |                    |                                                                       |
| Software, algorithm     | Prism                                       | Graphpad                          |                    |                                                                       |
| Software, algorithm     | R                                           | R Project                         |                    | Packages: pegas, Smisc, gplots                                        |

|       |                                    |                 |                 |  |
|-------|------------------------------------|-----------------|-----------------|--|
| Other | CellView glass bottom culture dish | Greiner Bio-one | Cat. #: 627860  |  |
| Other | Nitrocellulose membrane            | Biorad          | Cat. #: 1620112 |  |

655

656

657

658

## 659 **Phylogenetics**

660 Vertebrate genomes as well as genomes of *Drosophila melanogaster*, *Caenorhabditis*  
661 *elegans*, *Ciona intestinalis* and *Ciona savignyi* were downloaded from Ensembl (Yates et al.,  
662 2016), all accessed on 23/04/2016 except for pig (14/12/2017), marmoset and hagfish (both  
663 09/08/2018), excluding vertebrate species sequenced below five-fold genome coverage, *i.e.*  
664 with less than five reads per site on average. In addition, we downloaded the genomes of the  
665 elephant-shark (Venkatesh et al., 2014), whale-shark (Read et al., 2017), marmot (The  
666 Alpine Marmot Genome, BioProject PRJEB8272 on NCBI) and porpoise (Yuan et al., 2018).  
667 All potential homologs for the human isoforms of *CLTC/CLTCL1*, *MTMR4/MTMR3*, and  
668 *CLTA/CLTB*, in the above genomes were retrieved via BLAST (Boratyn et al., 2013). An *e*-  
669 value threshold of 0.001 with additional constraints applied by default in InParanoid version 7  
670 (Östlund et al., 2009) were used (at least 50% of the sequences are covered by the  
671 alignment, and at least 25% of the residues are aligned). The polar bear (*Ursus maritimus*)  
672 (Liu et al., 2014), brown bear (*Ursus arctos*) (Benazzo et al., 2017) and black bear (*Ursus*  
673 *americanus*) CHC17 and CHC22 protein sequences were manually added. For *CLTCL1* only  
674 the elephant and horse sequences (XP\_023397213.1 and XP\_023502410.1 respectively)  
675 were manually added.

676

677 The sequences corresponding to the longest transcripts were aligned with MAFFT (Katoch,  
678 Standley, 2013) and phylogenetic trees generated with PhyML (Guindon et al., 2010). The  
679 last two steps were repeated after manually removing outlier sequences lying on long  
680 branches (*CLTC/CLTCL1*: ENSTNIP00000007811.1, ENSTGUP00000014952.1,

681 XP\_023397213.1, XP\_023502410.1; *CLTA/CLTB*: ENSPSIP00000012669.1) and, in the  
682 case of genomes not retrieved from Ensembl (therefore lacking the gene-to-transcript  
683 mapping), sequences most likely corresponding to alternative transcripts (XP\_015350877.1,  
684 XP\_007899998.1, XP\_007899997.1, XP\_007904368.1, XP\_007904367.1,  
685 XP\_020375861.1, XP\_020375865.1, XP\_020375862.1, XP\_020392037.1,  
686 XP\_020375864.1, XP\_020375859.1). Trees were manually reconciled based on the  
687 Ensembl species tree extended by elephant-, whale shark, brown-, black bear, porpoise and  
688 marmot with TreeGraph (Stöver, Müller, 2010). Branch lengths were estimated based on the  
689 multiple sequence alignment (MSA) with PhyML fixing the manually reconciled topology, with  
690 options '-u' and '--constraint\_file'. With this approach no support values for splits are  
691 calculated. The resulting trees were used as input to generate a new phylogeny-aware  
692 MSAs with PRANK (Loytynoja, Goldman, 2005). Branch lengths of the reconciled topologies  
693 were then re-estimated based on the MSA generated by PRANK.

694

695 To compute evolutionary rates, the sequences and subtrees corresponding to *CLTC* and  
696 *CLTCL1* clades after duplication (i.e. excluding non-vertebrates) were extracted and  
697 sequences from species without either *CLTC* or *CLTCL1* were removed. The same  
698 procedure was performed for *MTMR4/MTMR3* and *CLTA/CLTB*. A phylogeny-aware MSA  
699 was computed with PRANK on the remaining sequences, and the amino acid alignment was  
700 converted to a codon alignment with PAL2NAL (Suyama, Torrents & Bork, 2006). Finally,  
701 dN/dS ratios (i.e. the ratio of the rate of nonsynonymous substitutions to the rate of  
702 synonymous substitutions) were inferred based on the codon alignments with PAML (Yang,  
703 2007) for the six proteins independently using the site model M7. Model M7 fits a Beta-  
704 distribution to the site rates by estimating the two Beta parameters shape and scale. Rates  
705 are estimated per site over the entire phylogeny, and therefore represent time averages.  
706 Phylogenetic trees of consensus amino acid sequences for bear samples only were  
707 computed using PhyML 3.1 (Guindon et al., 2010) with default values as implemented in  
708 Phylogeny.fr (Dereeper et al., 2008).



709

## 710 **Population genetics**

711 Phased genotypes were obtained by querying Variant Call Format (VCF) files (Danecek et  
712 al., 2011) from the 1000 Genomes Project database Phase 3 (1000 Genomes Project  
713 Consortium, 2015) for all available 2,504 samples. Only high-quality variants were retained  
714 using *vcflib* (<https://github.com/vcflib/vcflib>) with options “VT = SNP & QUAL > 1 & AC > 1 &  
715 DP > 5000”. Missing genotypes were assigned to homozygotes for the reference alleles.  
716 Finally, only sites with a recorded annotated function of being missense, nonsense, stop-loss  
717 or frame-shift for tested genes according to the UCSC Table Browser were retained (Speir et  
718 al., 2015) (tables `snp150` and `snp150CodingDbSnp`). For each retained position, the  
719 reference sequence for chimpanzee from the UCSC Table Browser (Speir et al., 2015) (table  
720 `snp150OrthoPt5Pa2Rm8`) was initially used to infer the putative ancestral state. For  
721 ambiguous or multiallelic states in the chimpanzee sequence, the human reference base  
722 was used as an initial proxy for the ancestral state. The predicted functional impact of amino  
723 acid replacements was obtained by using Polyphen (Adzhubei et al., 2010) and SIFT  
724 (Kumar, Henikoff & Ng, 2009). Additional frequency information for a single mutation of  
725 interest in more than 50 human populations was retrieved from the HGDP CEPH Panel  
726 (Cann et al., 2002) from <http://hgdp.uchicago.edu/cgi-bin/gbrowse/HGDP/>. Genotype data  
727 for farmers and hunter-gatherer individuals were collected from the Simons Genome  
728 Diversity Project Dataset (Mallick et al., 2016). Populations were merged based on their  
729 assigned geographical region with the following classification for hunter-gatherers: Africa  
730 (Biaka, Ju hoan North, Khomani San, Mbuti), Central Asia and Siberia (Aluet, Chukchi,  
731 Eskimo Chaplin, Eskimo Naukan, Eskimo Sireniki, Even, Itelman, Tlingit, Tubalar, Ulchi,  
732 Atayal), East and South Asia (Atayal, Kusunda). Farmer and hunter-gatherer allele  
733 frequencies were compared following a previously described approach (Raineri, Dabad &  
734 Heath, 2014). Briefly, we analytically computed the probability that the V allele is more  
735 frequent in farmers than in hunter gatherers while fully accounting for the uncertainty in the  
736 individual frequency estimates. V allele frequencies were inferred from allele counts of M



737 and V in a Bayesian framework with a conjugate Beta uniform prior. We recorded maximum  
738 *a posteriori* estimates with 95% highest posterior density credible intervals computed with  
739 the *Smisc* R library, version 0.3.9. We collected further published ancient DNA data from  
740 western Eurasia and classified into three genetic grouping: hunter-gatherer (HG), early  
741 farmer (EF) and steppe, using supervised ADMIXTURE (Alexander, Novembre & Lange,  
742 2009) as previously described (Mathieson & Mathieson, 2018). These are genetic groups  
743 and not directly based on differences in material culture or subsistence, but importantly in  
744 the case of HG and EF, these genetic classifications correspond closely to hunter-gatherer  
745 and agricultural subsistence strategies (Haak et al., 2015, Skoglund et al., 2014, Skoglund et  
746 al., 2012). We then restricted analysis to samples dated between 10,000 and 5,000 years  
747 before present that were classified as either HG or EF, leading to a dataset of 119 HG and  
748 316 EF of which 85 and 188 respectively had coverage at rs1061325. Frequencies for  
749 South-East Asians and ancient Eurasians were down-sampled to ensure numerical stability.  
750 The HeLa genomic data were accessed through the NIH database of Genotypes and  
751 Phenotypes (dbGaP at <http://www.ncbi.nlm.nih.gov/sites/entrez?db=gap>) through dbGaP  
752 accession number phs000640.

753

754 High-coverage VCF files for 79 individuals from six species of great apes were retrieved  
755 (Prado-Martinez et al., 2013). Data was filtered using *vcflib* on the combined data set with  
756 the options “QUAL > 32 & DP > 50 & DP < 7000 & FS < 27 & MQ > 25 & AC > 1”, similarly  
757 to the original manuscript describing this data set (Prado-Martinez et al., 2013). To retrieve  
758 nonsynonymous changes, only variants where the translated proteins for each allele differ  
759 were retained. We finally phased the data and assigned individual haplotypes using *shapeit*  
760 v2.r837 with the options “-burn 50 -prune 20 -main 100 -window 0.5 -effective-size 20000”.  
761 Additional 110 genomes of chimpanzees and bonobos were analyzed (Teixeira et al., 2015,  
762 De Manuel et al., 2016). Data filtering, functional annotation and haplotype phasing were  
763 performed as described above.

764

765 Full genome VCF files for two high-coverage archaic humans, namely one Altai Neanderthal  
766 (Prüfer et al., 2014) and one Denisova were retrieved (Meyer et al., 2012). Low-quality sites  
767 were filtered out using *vcflib* with the options “QUAL > 1 & DP > 10”. A pseudo-reference  
768 sequence for each archaic human was constructed by replacing the heterozygous sites with  
769 the previously inferred human ancestral state. Sequencing data information for additional  
770 ancient human samples were obtained from previously published high-quality whole genome  
771 sequences (Skoglund et al., 2014, Broushaki et al., 2016, Hofmanova et al., 2016, Lazaridis  
772 et al., 2014, Olalde et al., 2014, Raghavan et al., 2014, Seguin-Orlando et al., 2014, Fu et  
773 al., 2014). Genotype likelihoods were calculated using the standard GATK model (McKenna  
774 et al., 2010). Median-joining network plots were generated in R using *pegas* package  
775 (Paradis, 2010).

776

777 Several summary statistics were calculated on the inferred alleles to describe their levels of  
778 nucleotide diversity. Specifically, for each population separately, Watterson’s estimator of  
779 population mutation parameter (TW) (Watterson, 1975), Nei’s genetic diversity index (PI)  
780 (Nei, 1973), Tajima’s D (TD) (Tajima, 1989), Fu and Li’s D\* (FLDs) and F\* (FLFs) (Fu, Li,  
781 1993), the sum of squared allele frequencies including the most common allele (H1) and  
782 excluding it (H2) and their normalized ratio (H2H1) (Garud, Rosenberg, 2015, Garud et al.,  
783 2015) were calculated. We also computed genetic differentiation ( $F_{ST}$ ) (Reynolds, Weir &  
784 Cockerham, 1983) between pairs of canonical reference populations, namely Yoruban (YRI),  
785 Europeans (CEU), and Han Chinese (CHB).

786

787 To assess whether the observed summary statistics are expected under neutral evolution,  
788 genes with a coding length approximately equal (+/- 5%) to the one observed for the tested  
789 gene, *CLTCL1*, were selected. For this analysis, the longest isoform for each gene, and its  
790 annotation was considered according to refGene table from the UCSC Genome Browser.  
791 We discarded genes on chromosome 6 and on sex chromosomes, as well as *CLTA*, *CLTB*  
792 and *CLTC*. This set was further reduced to the first 500 genes with the closest genomic

793 length to *CLTCL1*. As summary statistics can be calculated only in case of genetic variability,  
794 genes showing no non-synonymous SNPs within each population were discarded. For each  
795 summary statistic, the empirical percentile rank for the value observed in *CLTCL1* compared  
796 to the whole distribution of control genes was calculated. Low or high values are suggestive  
797 of *CLTCL1* being an outlier in the empirical distribution. For plotting purposes, summary  
798 statistics and populations were clustered according to a dendrogram inferred from their  
799 respective distances based on the calculated matrix of empirical percentile ranks. That is,  
800 populations clustering together exhibit similar patterns of percentile ranks, and thus of  
801 summary statistics. The underlying dendrograms are not reported. The heatmap plot was  
802 generated using the function `heatmap.2` in R with the package *gplots*. Cells with an empirical  
803 percentile rank lower than 0.10 or greater than 0.90 were filled with the exact rank value. We  
804 also obtained a null distribution of summary statistics by performing coalescent simulations  
805 using *msms* (Ewing, Hermisson, 2010) under a previously derived demographic model for  
806 human populations (Gutenkunst et al., 2009).

807

### 808 **Structure prediction by modeling**

809 MODELLER v9.13 (Benjamin, Sali, 2014) was used to model the structure of the proximal  
810 leg segment of CHC22, using the crystal structure of bovine CHC17 (PDB 1B89) (Ybe et al.,  
811 1999) as a template. The model of the M1316V mutant was derived in a similar way using a  
812 mutated sequence. Structure visualization and analysis of residue interactions at the  
813 mutation site M1316 were performed using UCSF Chimera (Pettersen et al., 2004). The wild  
814 type and mutant homology models were positioned in the cryo-electron microscopy map of  
815 the bovine clathrin lattice (EMD: 5119) (Fotin et al., 2004) by structural superposition on the  
816 atomic model originally fitted in the map (PDB:1XI4).

817

### 818 **Functional experiments**

819 *Antibodies, plasmids and reagents*

820 Mouse monoclonal anti-CHC17 antibodies X22 (Brodsky, 1985), TD.1 (Näthke et al., 1992)  
821 and affinity-purified rabbit polyclonal antibody specific for CHC22 and not CHC17  
822 (Vassilopoulos et al., 2009) were produced in the Brodsky laboratory. Commercial sources  
823 of antibodies were as follows: mouse monoclonal anti- $\beta$ -actin (clone AC-15, Sigma), mouse  
824 monoclonal anti-HA (clone 16B12, Covance), rabbit polyclonal anti-CHC22 (Proteintech).  
825 Secondary antibodies coupled to HRP were from ThermoFisher, the secondary antibody  
826 coupled to Brilliant Violet 421 was from BioLegend. The HA-GLUT4-mCherry was generated  
827 by replacing the GFP from the HA-GLUT4-GFP construct (gift from Dr Tim McGraw  
828 (Lampson et al., 2000)) with mCherry using KpnI and EcoRI. The generation of the CHC22  
829 variant expressing a valine at position 1316 (CHC22V) was previously described (Esk et al.,  
830 2010). The CHC22 variant expressing a methionine at position 1316 (CHC22M) was  
831 generated from CHC22V by quick-change mutagenesis (New England Biotechnologies,  
832 USA) following manufacturer's instructions.

833

#### 834 *Small RNA interference*

835 Targeting siRNA was produced to interact with DNA sequences  
836 AAGCAATGAGCTGTTTGAAGA for CHC17 (Esk et al., 2010) (Qiagen),  
837 TCGGGCAAATGTGCCAAGCAA and AACTGGGAGGATCTAGTTAAA for CHC22 (1:1  
838 mixture of siRNAs were used) (Vassilopoulos et al., 2009) (Dharmacon). Non-targeting  
839 control siRNA was the Allstars Negative Control siRNA (Qiagen).

840

#### 841 *Cell culture*

842 HeLa cells were grown in Dulbecco's Modified Eagle Medium high glucose (Gibco)  
843 supplemented with 10% FBS (Gibco), 50 U/mL penicillin, 50  $\mu$ g/mL streptomycin (Gibco), 10  
844 mM Hepes (Gibco) and maintained at 37°C in a 5% CO<sub>2</sub> atmosphere. HeLa cells were free  
845 of mycoplasma infection.

846

#### 847 *siRNA and DNA transfection*

848 Cells were transfected for 72 hours with 20 nM of siRNA. Silencing was assessed by  
849 immunoblotting. Transient DNA transfections for rescue experiments were performed during  
850 the third day of silencing. For FACS experiments, cells (per well of 6-well plate, 70%  
851 confluent) were transiently transfected with 1 µg DNA for CHC22M-GFP and CHC22V-GFP,  
852 1.5 µg DNA for CHC17-GFP and HA-GLUT4-mCherry. For FRAP experiments, cells (per  
853 glass bottom dish, 60% confluent) were transfected with 0.75 µg DNA for CHC22-GFP (M or  
854 V) or 1.5 µg DNA for CHC17-GFP. FACS and FRAP experiments were carried out 24 hours  
855 later. All transfections were performed using JetPrime transfection reagent (PolyPlus)  
856 following manufacturer's instructions.

857

#### 858 *GLUT4 translocation assay using flow cytometry*

859 HeLa cells were grown in 6-well plates and transiently transfected with either HA-GLUT4-  
860 mCherry alone or in combination with GFP-tagged CHC22 (M or V) or CHC17-GFP the day  
861 before the experiment. The next day, cells were serum-starved (2 hours) before insulin  
862 stimulation (170 nM or vehicle (water) for 15 minutes, 37°C). Cells were then placed on ice  
863 and rapidly washed (2X, PBS, 4°C) and fixed (PFA 2%, 15 min). After fixation, cells were  
864 washed (2X, PBS, RT) then blocked for 1 hour (PBS 2% BSA, RT) before incubation with  
865 monoclonal anti-HA antibody (45 min, RT) to detect surface GLUT4. After incubation, cells  
866 were washed (3X, PBS, RT) and incubated with anti-mouse secondary Ig coupled to Brilliant  
867 Violet 421 (45 min, RT). Cells were then washed (5X, PBS, RT), gently lifted using a cell  
868 scraper (Corning), pelleted (800xg, 8 min) and re-suspended (PBS, 2% BSA, 4°C). Data  
869 was acquired with Diva acquisition software by LSRII flow cytometer (Becton Dickinson).  
870 Typically, 10,000 to 30,000 events were recorded and Mean Fluorescence Intensity (MFI)  
871 values for surface GLUT4 (Brilliant Violet 421) and total GLUT4 (mCherry) were recorded  
872 using 450/50 and 530/30 filters, respectively. The ratio of surface to total MFI was calculated  
873 to quantify the extent of GLUT4 translocation. MFI values for total GLUT4 (mCherry) were  
874 plotted for GLUT4 stability assays. Histograms and post-acquisition analysis were performed  
875 using FlowJo software (Treestar). Total GLUT4 and surface GLUT4 values are reported

876 separately for cells expressing CHC22 variants with equalized GFP signals at the top third  
877 (high), middle third (medium) and bottom third (low) levels of expression.

878

#### 879 *Fluorescence Recovery After Photobleaching*

880 The imaging of transiently transfected HeLa cells grown on Cellview glass bottom culture  
881 dishes (Greiner, Germany) was performed at 37°C in a 5% CO<sub>2</sub> atmosphere, using low 488  
882 nm laser power to minimize photobleaching using a 63x (1.4 NA) lens on a Leica SP8  
883 confocal microscope. A 2.0 μm<sup>2</sup> circular region of interest was positioned in the perinuclear  
884 region of the transfected cells, a region where both CHC22 and CHC17 naturally occupy. A  
885 100% laser power (488 nm) coupled to 11 iterations was performed to achieve GFP  
886 photobleaching. Recovery of fluorescence was recorded from 4 to 10 independent cells per  
887 dish. The experiment was repeated at least three times.

888

#### 889 *Immunoblotting*

890 HeLa cells protein extracts were quantified by BCA (Pierce), separated by SDS-PAGE (10%  
891 acrylamide), transferred to nitrocellulose membrane (0.2 μm, Biorad), labelled with primary  
892 antibodies (1-5 μg/mL), washed and labelled with species-specific horseradish peroxidase-  
893 conjugated secondary antibodies (ThermoFisher). Peroxidase activity was detected using  
894 Western Lightning Chemiluminescence Reagent (GE Healthcare). The molecular migration  
895 position of transferred proteins was compared to the PageRuler Prestain Protein Ladder 10  
896 to 170 kDa (Thermo Fisher Scientific). Signals were detected using the Chemidoc XRS+  
897 imaging system (Biorad) and quantifications were performed using Image J software (NIH).

898

#### 899 *Statistical analyses*

900 Graphs and statistical analyses were performed using Prism software (Graphpad). Detailed  
901 statistical information including statistical test used, number of independent experiments, *p*-  
902 values, definition of error bars is listed in individual figure legends. All experiments were  
903 performed at least three times.

904

905 **Acknowledgments:** This work was supported by grants from the National Institutes of  
906 Health (USA) DK095663 (FMB and MF) and AI090905 (PP) and Medical Research Council  
907 grant MR/S008144/1 to FMB. We are grateful to Libby Guethlein for helpful discussions on  
908 genomic data retrieval and processing. Genomic sequence data and cell culture studies  
909 reported here utilize the HeLa cell line. Henrietta Lacks, and the HeLa cell line that was  
910 established from her tumor cells, have made significant contributions to scientific progress  
911 and advances in human health.

912

913

914

915

916

917

918

919

920

921

922

## 923 **LIST OF ITEMS**

924

## 925 **Figure legends**

926

927 Figure 1. Phylogenetic analysis of *CLTC/CLTCL1* homologs reveals independent loss of the  
928 gene encoding CHC22 clathrin from vertebrate lineages and complete conservation of the  
929 gene encoding CHC17 clathrin. Phylogenetic profiles of *CLTC/CLTCL1* homologs are  
930 shown, with gene presence in the corresponding genome indicated by a filled black circle. All  
931 sequences used have less than 5% unspecified residues ('X's in the relevant database).



932 Divergent gene sequences with low sequence similarity but that still fall within the *CLTC*  
933 clade are shown as empty circles (see Materials and Methods for similarity threshold and  
934 sequence IDs). Based on the profile and species tree the most parsimonious phylogenetic  
935 tree for loss and duplication events is inferred and shown as red stars and blue squares,  
936 respectively.

937

938 Figure 1-figure supplement 1. Unreconciled phylogenetic tree for *CLTC* and *CLTCL1* across  
939 all investigated species.

940

941 Figure 1-figure supplement 2. Reconciled phylogenetic tree (therefore missing support  
942 values) for *CLTC* and *CLTCL1* across all investigated species.

943

944 Figure 2. Genes encoding clathrin heavy chains show evidence for purifying selection with  
945 *CLTCL1* (CHC22-encoding) more variable than *CLTC* (CHC17-encoding) over evolutionary  
946 time. Evolutionary rates expressed as dN/dS ratios are shown for each position in *CLTC* (A)  
947 and *CLTCL1* (B). Rates are averages over an entire phylogenetic tree and therefore not  
948 specific to the human proteins. However, to assist interpretation, only rates for residues  
949 present in the human proteins are shown. Kernel density estimates of the distributions of  
950 dN/dS ratios per paralogous pair of proteins (C-E). *CLTA* and *CLTB* encode clathrin light  
951 chains A and B, respectively. *MMTR3* and *MMTR4* encode myotubularin lipid phosphatases.  
952 Mean dN/dS ratios averaged over all sites are shown as hatched marks.

953

954 Figure 3. The *CLTCL1* gene encoding human CHC22 has two major variants, and is highly  
955 polymorphic relative to the human *CLTC* gene encoding CHC17, with a similar pattern in  
956 chimpanzees. Median joining network of human alleles for *CLTC* (A) and *CLTCL1* (B) are  
957 shown. Each circle represents a unique allele whose global frequency is proportional to its  
958 circle's size and the line length between circles is proportional to the number of non-  
959 synonymous changes between alleles. For *CLTC*, the least common alleles have a



960 frequency ranging from 0.04% and 0.06% and the circles representing them were magnified  
961 by a factor of 10. For *CLTCL1*, only alleles with an occurrence greater than 20 were plotted.  
962 The two major alleles show a combined frequency of 77% while the other alleles depicted in  
963 the figure have a frequency ranging from 0.44% to 5.67%. Segregation of the M1316V  
964 variation is depicted with a hashed line, with alleles carrying the M variant on the left-hand  
965 side, and alleles carrying the V variant on the right-hand side. The meta-populations in which  
966 the allele is found are indicated in color representing their percentage of the total frequency  
967 of the allele in humans. Meta-populations analyzed are African (AFR), American (AMR),  
968 East Asian (EAS), European (EUR), South Asian (SAS). C-D) Median joining network of  
969 *CLTC* (C) and *CLTCL1* (D) alleles for chimpanzees (*Pan troglodytes*, four identified  
970 subspecies and one unidentified) and bonobos (*Pan paniscus*). The allele frequency within  
971 each species and subspecies is color-coded.

972

973 Figure 3-figure supplement 1. Phylogenetic trees of amino acid sequences for *CLTC* and  
974 *CLTCL1* in the bear samples analyzed. Polar bear samples are labeled as “maritimus” while  
975 brown bear samples are labeled by the sampling country. Branch labels indicate branch  
976 lengths in 1/10,000 units.

977

978 Figure 4. Summary statistics for genetic diversity of *CLTCL1* indicate selection over neutral  
979 variation. For each human population (on the rows) we calculated several summary statistics  
980 to analyze diversity (on the columns, defined in Materials and Methods) and reported their  
981 percentile rank against their corresponding empirical distribution based on 500 control  
982 genes. The resulting matrix was then sorted on both axes as a dendrogram (not reported)  
983 based on the pairwise distances between each pair of populations. The populations  
984 analyzed, with their abbreviations, are listed in Supplementary File 1a, and the inclusive  
985 meta-population is indicated in parentheses, defined as in the legend to Figure 3. As  
986 depicted in the color legend, red and yellow denote low and high percentile ranks,

987 respectively. Percentiles lower than 0.10 or greater than 0.90 are given in the corresponding  
988 cell.

989

990 Figure 4-figure supplement 1. Variation of H2 statistics along a genomic region surrounding  
991 *CLTCL1* in four European populations, with abbreviations as defined in Supplementary File  
992 1a. Each window has a size of 20 kbp and step is 5 kbp.

993

994 Figure 4-figure supplement 2. Geographical distribution of M1316- and V1316-encoding  
995 alleles across human populations in the HGDP-CEPH panel data set. The ancestral allele T  
996 refers to amino acid M, while the derived nucleotide C refers to V.

997

998 Figure 4-figure supplement 3. Worldwide distribution of heterozygosity of M1316- and  
999 V1316-encoding alleles. A red triangle indicates an excess of heterozygosity (third tertile of  
1000 the ratio between observed and expected heterozygosity), a blue circle a deficiency of  
1001 heterozygosity (first tertile), and a grey square otherwise. The size of each symbol is  
1002 proportional to the frequency of heterozygous genotypes.

1003

1004 Figure 5. Frequencies of the V1316 variant of CHC22 trend higher in populations of farmers  
1005 compared to hunter-gatherers. Maximum a posteriori estimates and 95% highest posterior  
1006 density credible intervals of the frequency of V1316 are compared for modern and ancient  
1007 hunter-gatherer (HG) and farmer populations indigenous to three continents. Probability of  
1008 the V allele being at a higher frequency in farmers, labelled as  $P(f>hg)$ , is also reported.

1009

1010 Figure 6. Modeling of the structural changes in clathrin caused by the methionine-valine  
1011 dimorphism at residue 1316 predicts conformational alteration. Model of the CHC17 clathrin  
1012 lattice (A) is reproduced with permission (Fotin et al., 2004) with the region comprising  
1013 residue 1316 boxed. Panel B (top part) is the magnified boxed region in A with a CHC22-  
1014 M1316 model (residues 1210 to 1516) docked into one of the four clathrin heavy chains

1015 (CHC-1) forming the edge of the lattice. The black arrow shows the location of the amino  
1016 acid residue 1316 with the side chain highlighted in CHC-1. The density of the other three  
1017 CHCs is indicated. Computational models of human CHC22 (residues 1210 to 1516) with  
1018 either Met or Val at position 1316 (B, lower parts). The yellow circle encloses space opened  
1019 by reducing the side chain size, which would require a shift in CHC torque to regain  
1020 structurally favorable side chain contacts.

1021

1022 Figure 7. The CHC22-M1316 and CHC22-V1316 allotypes have different dynamics of  
1023 membrane association, as measured by fluorescence recovery after photobleaching (FRAP).  
1024 HeLa cells were transfected with CHC22-M1316-GFP (CHC22M) or CHC22-V1316-GFP  
1025 (CHC22V) or CHC17-GFP and the expressed constructs were localized relative to  
1026 endogenous CHC22 and CHC17, which were also compared to each other (A).  
1027 Endogenous CHC22, CHC17 and the transfected proteins were visualized by  
1028 immunofluorescence with anti-CHC22 rabbit polyclonal antibody (pAb, red), anti-CHC17  
1029 mouse monoclonal antibody (mAb, green) and anti-GFP chicken polyclonal antibody (green  
1030 for CHC17-GFP or red for CHC22-GFP), respectively. Bars represent 3  $\mu\text{m}$  (untransfected  
1031 and CHC22M-GFP) and 5  $\mu\text{m}$  (CHC22V-GFP and CHC17-GFP). Transfectants were  
1032 photobleached in the circular region indicated (B) and recovery of fluorescence (FRAP) was  
1033 visualized over time (bars, 10  $\mu\text{m}$ ) and quantified within the bleached regions (C). For the  
1034 data in (C), area under the curves (D) and mobile fractions  $M_f$  (E) were calculated  
1035 (Lippincott-Schwartz, Snapp & Kenworthy, 2001). We performed a one-way analysis of  
1036 variance (ANOVA) with Tukey's multiple comparison post-hoc test: \*  $p$ -value < 0.05, \*\*  $p$ -  
1037 value < 0.01.

1038

1039 Figure 8. Differences in intracellular GLUT4 sequestration and stability occur in cells  
1040 expressing the CHC22-M1316 or CHC22-V1316 allotypes. HeLa cells were treated with  
1041 siRNA to deplete endogenous CHC22 or with control siRNA, then transfected to co-express  
1042 HA-GLUT4-mCherry along with CHC17-GFP (CHC17), CHC22-M1316-GFP (CHC22M) or

1043 CHC22-V1316-GFP (CHC22V) (A and B). Total levels of expressed GLUT4 and CHC were  
1044 measured by FACS (mean fluorescence intensity (MFI) for mCherry or GFP, respectively).  
1045 Surface levels of GLUT4 were measured with anti-HA antibody at basal conditions (-) or  
1046 after 30 minutes of exposure to insulin (+) and surface/total GLUT4 is reported as a measure  
1047 of GLUT4 translocation to the cell surface (A) in cells expressing equivalent total levels of  
1048 CHC-GFP. The extent of GLUT4 translocation was assessed in each experimental group  
1049 before and after insulin stimulation with a Student t-test, \*  $p$ -value < 0.05. Transfected cells  
1050 treated with siRNA to deplete endogenous CHC22, but not treated with insulin, were gated  
1051 into thirds expressing equivalently low (L), medium (M) and high (H) levels of CHC-GFP for  
1052 each type of CHC, then total levels of HA-GLUT4-mCherry in each population were plotted  
1053 (B). We performed a one-way analysis of variance (ANOVA) with Tukey's multiple  
1054 comparison post-hoc test: \*  $p$ -value < 0.05.

1055

## 1056 **SUPPLEMENTARY INFORMATION**

1057

### 1058 **Supplementary Files**

1059

1060 Supplementary File 1a. Human populations from the 1000 Genomes Project analyzed with  
1061 their abbreviation.

1062

1063 Supplementary File 1b Human alleles for the coding region of *CLTLC1* extracted from the  
1064 1000 Genomes project data set. For each unique allele (hap\_ID on the first column), the  
1065 count of occurrences in each meta-population (EUR, EAS, AMR, SAS, AFR defined as in the  
1066 legend to Figure 3), archaic humans (Altai Neanderthal and Denisovan) and modern  
1067 chimpanzees is reported. Columns numbered 1-46 indicate the nucleotide sequence at all  
1068 retrieved SNPs present in each allele. Hap-1 is the most frequent allele encoding M1316 in  
1069 CHC22 and Hap-2 is the most frequent allele encoding V1316 in CHC22.

1070

1071 Supplementary File 1c. Functional annotation for each coding polymorphism of *CLTCL1*  
1072 reported in Supplementary File 1b. Columns represent chromosome, genomic position, SNP  
1073 ID, reference allele, alternate allele and functional impact.

1074

1075 Supplementary File 1d. Archaic and ancient human M1316V genotypes retrieved. Genotype  
1076 likelihoods and sources for each sample are reported.

1077

1078 Supplementary File 2a. Summary statistics of genetic diversity for *CLTCL1* calculated for all  
1079 analyzed human populations. Abbreviations for summary statistics (on the columns) are  
1080 reported in Materials and Methods while abbreviations for populations (POP, on the rows)  
1081 are listed in Supplementary File 1a.

1082

1083 Supplementary File 2b. List of 500 control genes used to assess deviation from neutrality in  
1084 the summary statistics of *CLTCL1*.

1085

1086 Supplementary File 2c. Expected and observed heterozygosity for M1316 and V1316 for all  
1087 analyzed human populations. For each population (Pop., on rows, with abbreviations  
1088 described in Supplementary File 1a), the frequency of observed homozygous (Obs.Homo1  
1089 and Obs.Homo2) and heterozygous genotypes (Obs.Hetero), the corresponding expected  
1090 values under Hardy-Weinberg equilibrium (Exp.Homo1, Exp.Homo2, Exp.Hetero), the ratio  
1091 (RatioHetero) between observed and expected heterozygosity, and *p*-values for deviation  
1092 from Hardy-Weinberg equilibrium (chi-squared test) are reported.

1093

1094 Supplementary File 3a Inferred CHC22 allotypes for great apes and human genome  
1095 reference. For each unique allele (hap\_ID on the first column), the frequency in each species  
1096 or subspecies and the amino acid sequence at each numbered position in the encoded  
1097 CHC22 allotype is reported.

1098

1099 Supplementary File 3b. Inferred CHC22 allotypes for chimpanzees and bonobos. For each  
1100 unique allele (hap\_ID on the first column), the frequency in each species or subspecies, and  
1101 the amino acid sequence at each numbered position in the encoded CHC22 allotype is  
1102 reported.

1103

1104 Supplementary File 3c. Differences in the amino acid sequences for CHC22 allotypes in  
1105 bears. The first row depicts the species, while the second row is the originating country for  
1106 each sample. All remaining rows are the numbered positions of the polymorphic sites in  
1107 CHC22 encoded in brown bears and polar bears and indicate the amino acid is present in  
1108 each sample's sequence. Amino acids for the reference sequences of black bears, pandas  
1109 and humans are also reported at these polymorphic positions.

1110

1111 Figure 7-source data 1.

1112 Figure 7-source data 2.

1113 Figure 7-source data 3.

1114 Figure 8-source data 1.

1115 Figure 8-source data 2.

1116

1117

## 1118 **References**

1119

1120 1000 Genomes Project Consortium 2015, "A global reference for human genetic variation",  
1121 *Nature*, vol. 526, no. 7571, pp. 68-74.

1122 Adey, A., Burton, J.N., Kitzman, J.O., Hiatt, J.B., Lewis, A.P., Martin, B.K., Qiu, R., Lee, C. &  
1123 Shendure, J. 2013, "The haplotype-resolved genome and epigenome of the aneuploid  
1124 HeLa cancer cell line", *Nature*, vol. 500, no. 7461, pp. 207.

- 1125 Adzhubei, I.A., Schmidt, S., Peshkin, L., Ramensky, V.E., Gerasimova, A., Bork, P.,  
1126 Kondrashov, A.S. & Sunyaev, S.R. 2010, "A method and server for predicting damaging  
1127 missense mutations", *Nature methods*, vol. 7, no. 4, pp. 248-249.
- 1128 Alexander, D.H., Novembre, J. & Lange, K. 2009, "Fast model-based estimation of ancestry  
1129 in unrelated individuals", *Genome research*, vol. 19, no. 9, pp. 1655-1664.
- 1130 Amores, A., Catchen, J., Ferrara, A., Fontenot, Q. & Postlethwait, J.H. 2011, "Genome  
1131 evolution and meiotic maps by massively parallel DNA sequencing: spotted gar, an  
1132 outgroup for the teleost genome duplication", *Genetics*, vol. 188, no. 4, pp. 799-808.
- 1133 Babbitt, C.C., Warner, L.R., Fedrigo, O., Wall, C.E. & Wray, G.A. 2011, "Genomic signatures  
1134 of diet-related shifts during human origins", *Proceedings of the Royal Society B.  
1135 Biological sciences*, vol. 278, no. 1708, pp. 961-969.
- 1136 Benazzo, A., Trucchi, E., Cahill, J.A., Maisano Delser, P., Mona, S., Fumagalli, M.,  
1137 Bunnefeld, L., Cornetti, L., Ghirotto, S., Girardi, M., Ometto, L., Panziera, A., Rota-  
1138 Stabelli, O., Zanetti, E., Karamanlidis, A., Groff, C., Paule, L., Gentile, L., Vila, C.,  
1139 Vicario, S., Boitani, L., Orlando, L., Fuselli, S., Vernesi, C., Shapiro, B., Ciucci, P. &  
1140 Bertorelle, G. 2017, "Survival and divergence in a small group: The extraordinary  
1141 genomic history of the endangered Apennine brown bear stragglers", *Proceedings of  
1142 the National Academy of Sciences of the United States of America*, vol. 114, no. 45, pp.  
1143 E9589-E9597.
- 1144 Benjamin, W. & Sali, A. 2014, "Comparative protein structure modeling using MODELLER",  
1145 *Current protocols in Bioinformatics*, vol. 47, pp. 5-6.
- 1146 Bojarska, K. & Selva, N. 2012, "Spatial patterns in brown bear *Ursus arctos* diet: the role of  
1147 geographical and environmental factors", *Mammal Review*, vol. 42, no. 2, pp. 120-143.
- 1148 Boratyn, G.M., Camacho, C., Cooper, P.S., Coulouris, G., Fong, A., Ma, N., Madden, T.L.,  
1149 Matten, W.T., McGinnis, S.D., Merezhuk, Y. *et al.* 2013, "BLAST: a more efficient report  
1150 with usability improvements", *Nucleic acids research*, vol. 41, no. W1, pp. W29-W33.



- 1151 Bright, L.J., Kambesis, N., Nelson, S.B., Jeong, B. & Turkewitz, A.P. 2010, "Comprehensive  
1152 analysis reveals dynamic and evolutionary plasticity of Rab GTPases and membrane  
1153 traffic in *Tetrahymena thermophila*", *PLoS genetics*, vol. 6, no. 10, pp. e1001155.
- 1154 Brodsky, F.M. 2012, "Diversity of clathrin function: new tricks for an old protein", *Annual  
1155 Review of Cell and Developmental Biology*, vol. 28, pp 309-336.
- 1156 Brodsky, F.M. 1985, "Clathrin structure characterized with monoclonal antibodies. I. Analysis  
1157 of multiple antigenic sites", *The Journal of cell biology*, vol. 101, no. 6, pp. 2047-2054.
- 1158 Broushaki, F., Thomas, M.G., Link, V., Lopez, S., van Dorp, L., Kirsanow, K., Hofmanova, Z.,  
1159 Diekmann, Y., Cassidy, L.M., Diez-Del-Molino, D., Kousathanas, A., Sell, C., Robson,  
1160 H.K., Martiniano, R., Blocher, J., Scheu, A., Kreutzer, S., Bollongino, R., Bobo, D.,  
1161 Davudi, H., Munoz, O., Currat, M., Abdi, K., Biglari, F., Craig, O.E., Bradley, D.G.,  
1162 Shennan, S., Veeramah, K., Mashkour, M., Wegmann, D., Hellenthal, G. & Burger, J.  
1163 2016, "Early Neolithic genomes from the eastern Fertile Crescent", *Science (New York,  
1164 N.Y.)*, vol. 353, no. 6298, pp. 499-503.
- 1165 Bryant, N.J., Govers, R. & James, D.E. 2002, "Regulated transport of the glucose  
1166 transporter GLUT4", *Nature reviews molecular cell biology*, vol. 3, no. 4, pp. 267-277.
- 1167 Camus, S.M., Camus, M.D., Sadacca, L.A., Esk, C., Gould, G.W., Kioumourtzoglou, D.,  
1168 Bryant, N.J., Mukherjee, S. & Brodsky, F.M. 2018, "CHC22 clathrin diverts GLUT4 from  
1169 the ER-to-Golgi intermediate compartment for intracellular sequestration", *bioRxiv*, doi:  
1170 <https://doi.org/10.1101/>, pp. 242941.
- 1171 Cann, H.M., De Toma, C., Cazes, L., Legrand, M., Morel, V., Piouffre, L., Bodmer, J.,  
1172 Bodmer, W.F., Bonne-Tamir, B. & Cambon-Thomsen, A. 2002, "A human genome  
1173 diversity cell line panel", *Science*, vol. 296, no. 5566, pp. 261-262.
- 1174 Charlesworth, D. 2006, "Balancing selection and its effects on sequences in nearby genome  
1175 regions", *PLoS genetics*, vol. 2, no. 4, pp. e64.
- 1176 Dacks, J.B. & Robinson, M.S. 2017, "Outerwear through the ages: evolutionary cell biology  
1177 of vesicle coats", *Current opinion in cell biology*, vol. 47, pp. 108-116.

- 1178 Danecek, P., Auton, A., Abecasis, G., Albers, C.A., Banks, E., DePristo, M.A., Handsaker,  
1179 R.E., Lunter, G., Marth, G.T. & Sherry, S.T. 2011, "The variant call format and  
1180 VCFtools", *Bioinformatics*, vol. 27, no. 15, pp. 2156-2158.
- 1181 Dannhauser, P.N., Camus, S.M., Sakamoto, K., Sadacca, L.A., Torres, J.A., Camus, M.D.,  
1182 Briant, K., Vassilopoulos, S., Rothnie, A., Smith, C.J. & Brodsky, F.M. 2017, "CHC22  
1183 and CHC17 clathrins have distinct biochemical properties and display differential  
1184 regulation and function", *The Journal of biological chemistry*, vol. 292, no. 51, pp.  
1185 20834-20844.
- 1186 De Manuel, M., Kuhlwilm, M., Frandsen, P., Sousa, V.C., Desai, T., Prado-Martinez, J.,  
1187 Hernandez-Rodriguez, J., Dupanloup, I., Lao, O., Hallast, P. 2016, *et al.* "Chimpanzee  
1188 genomic diversity reveals ancient admixture with bonobos", *Science*, vol. 354, no. 6311,  
1189 pp. 477-481.
- 1190 Dereeper, A., Guignon, V., Blanc, G., Audic, S., Buffet, S., Chevenet, F., Dufayard, J.,  
1191 Guindon, S., Lefort, V. & Lescot, M. 2008, "Phylogeny.fr: robust phylogenetic analysis  
1192 for the non-specialist", *Nucleic acids research*, vol. 36, no. suppl\_2, pp. W465-W469.
- 1193 Diekmann, Y., Seixas, E., Gouw, M., Tavares-Cadete, F., Seabra, M.C. & Pereira-Leal, J.B.  
1194 2011, "Thousands of rab GTPases for the cell biologist", *PLoS computational biology*,  
1195 vol. 7, no. 10, pp. e1002217.
- 1196 dos Reis, M., Thawornwattana, Y., Angelis, K., Telford, M.J., Donoghue, P.C. & Yang, Z.  
1197 2015, "Uncertainty in the timing of origin of animals and the limits of precision in  
1198 molecular timescales", *Current biology*, vol. 25, no. 22, pp. 2939-2950.
- 1199 Dunbar, R.I.M. 2019, "Fire and the biogeography of Palaeo hominins." in *Landscapes of*  
1200 *Human Evolution: Contributions in honour of John Gowlett*, eds. J. Cole, J. McNabb &  
1201 M. Grove, ArcheoPress, Oxford.
- 1202 Elde, N.C. & Malik, H.S. 2009, "The evolutionary conundrum of pathogen mimicry", *Nature*  
1203 *reviews microbiology*, vol. 7, no. 11, pp. 787-797.

- 1204 Esk, C., Chen, C.Y., Johannes, L. & Brodsky, F.M. 2010, "The clathrin heavy chain isoform  
1205 CHC22 functions in a novel endosomal sorting step", *The Journal of cell biology*, vol.  
1206 188, no. 1, pp. 131-144.
- 1207 Ewing, G. & Hermisson, J. 2010, "MSMS: a coalescent simulation program including  
1208 recombination, demographic structure and selection at a single locus", *Bioinformatics*,  
1209 vol. 26, no. 16, pp. 2064-2065.
- 1210 Fotin, A., Cheng, Y., Sliz, P., Grigorieff, N., Harrison, S.C., Kirchhausen, T. & Walz, T. 2004,  
1211 "Molecular model for a complete clathrin lattice from electron cryomicroscopy", *Nature*,  
1212 vol. 432, no. 7017, pp. 573-579.
- 1213 Fu, Q., Li, H., Moorjani, P., Jay, F., Slepchenko, S.M., Bondarev, A.A., Johnson, P.L.,  
1214 Aximu-Petri, A., Prüfer, K., de Filippo, C. *et al.* 2014, "Genome sequence of a 45,000-  
1215 year-old modern human from western Siberia", *Nature*, vol. 514, no. 7523, pp. 445-449.
- 1216 Fu, Y.X. & Li, W.H. 1993, "Statistical tests of neutrality of mutations", *Genetics*, vol. 133, no.  
1217 3, pp. 693-709.
- 1218 Fumagalli, M., Sironi, M., Pozzoli, U., Ferrer-Admettla, A., Pattini, L. & Nielsen, R. 2011,  
1219 "Signatures of environmental genetic adaptation pinpoint pathogens as the main  
1220 selective pressure through human evolution", *PLoS genetics*, vol. 7, no. 11, pp.  
1221 e1002355.
- 1222 Garud, N.R., Messer, P.W., Buzbas, E.O. & Petrov, D.A. 2015, "Recent selective sweeps in  
1223 North American *Drosophila melanogaster* show signatures of soft sweeps", *PLoS*  
1224 *genetics*, vol. 11, no. 2, pp. e1005004.
- 1225 Garud, N.R. & Rosenberg, N.A. 2015, "Enhancing the mathematical properties of new  
1226 haplotype homozygosity statistics for the detection of selective sweeps", *Theoretical*  
1227 *population biology*, vol. 102, pp. 94-101.
- 1228 Guerrier, S., Plattner, H., Richardson, E., Dacks, J.B. & Turkewitz, A.P. 2017, "An  
1229 evolutionary balance: conservation vs innovation in ciliate membrane trafficking", *Traffic*,  
1230 vol. 18, no. 1, pp. 18-28.

- 1231 Guindon, S., Dufayard, J., Lefort, V., Anisimova, M., Hordijk, W. & Gascuel, O. 2010, "New  
1232 algorithms and methods to estimate maximum-likelihood phylogenies: assessing the  
1233 performance of PhyML 3.0", *Systematic biology*, vol. 59, no. 3, pp. 307-321.
- 1234 Gutenkunst, R.Y., Hernandez, R.D., Williamson, S.H. & Bustamante, C.D. 2009, "Inferring  
1235 the joint demographic history of multiple populations from multidimensional SNP  
1236 frequency data", *PLoS genetics*, vol. 5, no. 10, pp. e1000695.
- 1237 Haak, W., Lazaridis, I., Patterson, N., Rohland, N., Mallick, S., Llamas, B., Brandt, G.,  
1238 Nordenfelt, S., Harney, E., Stewardson, K. *et al.* 2015, "Massive migration from the  
1239 steppe was a source for Indo-European languages in Europe", *Nature*, vol. 522, no.  
1240 7555, pp. 207.
- 1241 Haga, Y., Ishii, K. & Suzuki, T. 2011, "N-glycosylation is critical for the stability and  
1242 intracellular trafficking of glucose transporter GLUT4", *The Journal of biological*  
1243 *chemistry*, vol. 286, no. 36, pp. 31320-31327.
- 1244 Hardy, K., Brand-Miller, J., Brown, K.D., Thomas, M.G. & Copeland, L. 2015, "The  
1245 importance of dietary carbohydrate in human evolution", *The Quarterly review of*  
1246 *biology*, vol. 90, no. 3, pp. 251-268.
- 1247 Hedges, S.B., Marin, J., Suleski, M., Paymer, M. & Kumar, S. 2015, "Tree of life reveals  
1248 clock-like speciation and diversification", *Molecular biology and evolution*, vol. 32, no. 4,  
1249 pp. 835-845.
- 1250 Hocquette, J.F., Bornes, F., Balage, M., Ferre, P., Grizard, J. & Vermorel, M. 1995,  
1251 "Glucose-transporter (GLUT4) protein content in oxidative and glycolytic skeletal  
1252 muscles from calf and goat", *The biochemical journal*, vol. 305 (Pt 2), pp. 465-470.
- 1253 Hofmanova, Z., Kreutzer, S., Hellenthal, G., Sell, C., Diekmann, Y., Diez-Del-Molino, D., van  
1254 Dorp, L., Lopez, S., Kousathanas, A., Link, V., Kirsanow, K., Cassidy, L.M., Martiniano,  
1255 R., Strobel, M., Scheu, A., Kotsakis, K., Halstead, P., Triantaphyllou, S., Kyparissi-  
1256 Apostolika, N., Urem-Kotsou, D., Ziota, C., Adaktylou, F., Gopalan, S., Bobo, D.M.,  
1257 Winkelbach, L., Blocher, J., Unterlander, M., Leuenberger, C., Cilingiroglu, C., Horejs,  
1258 B., Gerritsen, F., Shennan, S.J., Bradley, D.G., Currat, M., Veeramah, K.R., Wegmann,

- 1259 D., Thomas, M.G., Papageorgopoulou, C. & Burger, J. 2016, "Early farmers from across  
1260 Europe directly descended from Neolithic Aegeans", *Proceedings of the National*  
1261 *Academy of Sciences of the United States of America*, vol. 113, no. 25, pp. 6886-6891.
- 1262 Inchley, C.E., Larbey, C.D., Shwan, N.A., Pagani, L., Saag, L., Antão, T., Jacobs, G.,  
1263 Hudjashov, G., Metspalu, E. & Mitt, M. 2016, "Selective sweep on human amylase  
1264 genes postdates the split with Neanderthals", *Scientific reports*, vol. 6, pp. 37198.
- 1265 Katoh, K. & Standley, D.M. 2013, "MAFFT multiple sequence alignment software version 7:  
1266 improvements in performance and usability", *Molecular biology and evolution*, vol. 30,  
1267 no. 4, pp. 772-780.
- 1268 Kong, A., Gudbjartsson, D.F., Sainz, J., Jonsdottir, G.M., Gudjonsson, S.A., Richardsson, B.,  
1269 Sigurdardottir, S., Barnard, J., Hallbeck, B., Masson, G. *et al.* 2002, "A high-resolution  
1270 recombination map of the human genome", *Nature genetics*, vol. 31, no. 3, pp. 241.
- 1271 Kumar, P., Henikoff, S. & Ng, P.C. 2009, "Predicting the effects of coding non-synonymous  
1272 variants on protein function using the SIFT algorithm", *Nature protocols*, vol. 4, no. 7,  
1273 pp. 1073.
- 1274 Lampson, M.A., Racz, A., Cushman, S.W. & McGraw, T.E. 2000, "Demonstration of insulin-  
1275 responsive trafficking of GLUT4 and vpTR in fibroblasts", *Journal of cell science*, vol.  
1276 113 (Pt 22), no. Pt 22, pp. 4065-4076.
- 1277 Landry, J.J., Pyl, P.T., Rausch, T., Zichner, T., Tekkedil, M.M., Stutz, A.M., Jauch, A., Aiyar,  
1278 R.S., Pau, G., Delhomme, N., Gagneur, J., Korbel, J.O., Huber, W. & Steinmetz, L.M.  
1279 2013, "The genomic and transcriptomic landscape of a HeLa cell line", *G3 (Bethesda,*  
1280 *MD)*, vol. 3, no. 8, pp. 1213-1224.
- 1281 Lazaridis, I., Patterson, N., Mitnik, A., Renaud, G., Mallick, S., Kirsanow, K., Sudmant, P.H.,  
1282 Schraiber, J.G., Castellano, S., Lipson, M. *et al.* 2014, "Ancient human genomes  
1283 suggest three ancestral populations for present-day Europeans", *Nature*, vol. 513, no.  
1284 7518, pp. 409-413.
- 1285 Lippincott-Schwartz, J., Snapp, E. & Kenworthy, A. 2001, "Studying protein dynamics in  
1286 living cells", *Nature reviews molecular cell biology*, vol. 2, no. 6, pp. 444.

- 1287 Liu, S., Lorenzen, E.D., Fumagalli, M., Li, B., Harris, K., Xiong, Z., Zhou, L., Korneliussen,  
1288 T.S., Somel, M., Babbitt, C. *et al.* 2014, "Population genomics reveal recent speciation  
1289 and rapid evolutionary adaptation in polar bears", *Cell*, vol. 157, no. 4, pp. 785-794.
- 1290 Liu, S.H., Towler, M.C., Chen, E., Chen, C.Y., Song, W., Apodaca, G. & Brodsky, F.M. 2001,  
1291 "A novel clathrin homolog that co-distributes with cytoskeletal components functions in  
1292 the trans-Golgi network", *The EMBO journal*, vol. 20, no. 1-2, pp. 272-284.
- 1293 Loytynoja, A. & Goldman, N. 2005, "An algorithm for progressive multiple alignment of  
1294 sequences with insertions", *Proceedings of the National Academy of Sciences of the*  
1295 *United States of America*, vol. 102, no. 30, pp. 10557-10562.
- 1296 Mallick, S., Li, H., Lipson, M., Mathieson, I., Gymrek, M., Racimo, F., Zhao, M., Chennagiri,  
1297 N., Nordenfelt, S., Tandon, A. *et al.* 2016, "The Simons Genome Diversity Project: 300  
1298 genomes from 142 diverse populations", *Nature*, vol. 538, no. 7624, pp. 201-206.
- 1299 Mathieson, S. & Mathieson, I. 2018, "*FADS1* and the timing of human adaptation to  
1300 agriculture", *Molecular biology and evolution*, vol. 35, issue 12, pp. 2957-2970.
- 1301 McKenna, A., Hanna, M., Banks, E., Sivachenko, A., Cibulskis, K., Kernytzky, A., Garimella,  
1302 K., Altshuler, D., Gabriel, S., Daly, M. & DePristo, M.A. 2010, "The Genome Analysis  
1303 Toolkit: a MapReduce framework for analyzing next-generation DNA sequencing data",  
1304 *Genome research*, vol. 20, no. 9, pp. 1297-1303.
- 1305 Messer, P.W. & Petrov, D.A. 2013, "Population genomics of rapid adaptation by soft  
1306 selective sweeps", *Trends in ecology & evolution*, vol. 28, no. 11, pp. 659-669.
- 1307 Meyer, M., Kircher, M., Gansauge, M.T., Li, H., Racimo, F., Mallick, S., Schraiber, J.G., Jay,  
1308 F., Prufer, K., de Filippo, C., Sudmant, P.H., Alkan, C., Fu, Q., Do, R., Rohland, N.,  
1309 Tandon, A., Siebauer, M., Green, R.E., Bryc, K., Briggs, A.W., Stenzel, U., Dabney, J.,  
1310 Shendure, J., Kitman, J., Hammer, M.F., Shunkov, M.V., Derevianko, A.P., Patterson,  
1311 N., Andres, A.M., Eichler, E.E., Slatkin, M., Reich, D., Kelso, J. & Paabo, S. 2012, "A  
1312 high-coverage genome sequence from an archaic Denisovan individual", *Science (New*  
1313 *York, N.Y.)*, vol. 338, no. 6104, pp. 222-226.

- 1314 Nahorski, M.S., Al-Gazali, L., Hertecant, J., Owen, D.J., Borner, G.H., Chen, Y., Benn, C.L.,  
1315 Carvalho, O.P., Shaikh, S.S. & Phelan, A. 2015, "A novel disorder reveals clathrin heavy  
1316 chain-22 is essential for human pain and touch development", *Brain*, vol. 138, no. 8, pp.  
1317 2147-2160.
- 1318 Näthke, I.S., Heuser, J., Lupas, A., Stock, J., Turck, C.W. & Brodsky, F.M. 1992, "Folding  
1319 and trimerization of clathrin subunits at the triskelion hub", *Cell*, vol. 68, no. 5, pp. 899-  
1320 910.
- 1321 Nei, M. 1973, "Analysis of gene diversity in subdivided populations", *Proceedings of the*  
1322 *National Academy of Sciences of the United States of America*, vol. 70, no. 12, pp.  
1323 3321-3323.
- 1324 Olalde, I., Allentoft, M.E., Sánchez-Quinto, F., Santpere, G., Chiang, C.W., DeGiorgio, M.,  
1325 Prado-Martinez, J., Rodríguez, J.A., Rasmussen, S., Quilez, J. *et al.* 2014, "Derived  
1326 immune and ancestral pigmentation alleles in a 7,000-year-old Mesolithic European",  
1327 *Nature*, vol. 507, no. 7491, pp. 225-228.
- 1328 Östlund, G., Schmitt, T., Forslund, K., Köstler, T., Messina, D.N., Roopra, S., Frings, O. &  
1329 Sonnhammer, E.L. 2009, "InParanoid 7: new algorithms and tools for eukaryotic  
1330 orthology analysis", *Nucleic acids research*, vol. 38, no. suppl\_1, pp. D196-D203.
- 1331 Paradis, E. 2010, "pegas: an R package for population genetics with an integrated–modular  
1332 approach", *Bioinformatics*, vol. 26, no. 3, pp. 419-420.
- 1333 Pettersen, E.F., Goddard, T.D., Huang, C.C., Couch, G.S., Greenblatt, D.M., Meng, E.C. &  
1334 Ferrin, T.E. 2004, "UCSF Chimera—a visualization system for exploratory research and  
1335 analysis", *Journal of computational chemistry*, vol. 25, no. 13, pp. 1605-1612.
- 1336 Prado-Martinez, J., Sudmant, P.H., Kidd, J.M., Li, H., Kelley, J.L., Lorente-Galdos, B.,  
1337 Veeramah, K.R., Woerner, A.E., O'Connor, T.D., Santpere, G. *et al.* 2013, "Great ape  
1338 genetic diversity and population history", *Nature*, vol. 499, no. 7459, pp. 471-475.
- 1339 Prüfer, K., Racimo, F., Patterson, N., Jay, F., Sankararaman, S., Sawyer, S., Heinze, A.,  
1340 Renaud, G., Sudmant, P.H., De Filippo, C. *et al.* 2014, "The complete genome



- 1341 sequence of a Neanderthal from the Altai Mountains", *Nature*, vol. 505, no. 7481, pp.  
1342 43-49.
- 1343 Raghavan, M., Skoglund, P., Graf, K.E., Metspalu, M., Albrechtsen, A., Moltke, I.,  
1344 Rasmussen, S., Stafford Jr, T.W., Orlando, L., Metspalu, E. *et al.* 2014, "Upper  
1345 Palaeolithic Siberian genome reveals dual ancestry of Native Americans", *Nature*, vol.  
1346 505, no. 7481, pp. 87-91.
- 1347 Raineri, E., Dabad, M. & Heath, S. 2014, "A note on exact differences between beta  
1348 distributions in genomic (methylation) studies", *PLoS One*, vol. 9, no. 5, pp. e97349.
- 1349 Read, T.D., Petit, R.A., Joseph, S.J., Alam, M.T., Weil, M.R., Ahmad, M., Bhimani, R.,  
1350 Vuong, J.S., Haase, C.P. & Webb, D.H. 2017, "Draft sequencing and assembly of the  
1351 genome of the world's largest fish, the whale shark: *Rhincodon typus* Smith 1828", *BMC*  
1352 *genomics*, vol. 18, no. 1, pp. 532.
- 1353 Reynolds, J., Weir, B.S. & Cockerham, C.C. 1983, "Estimation of the coancestry coefficient:  
1354 basis for a short-term genetic distance", *Genetics*, vol. 105, no. 3, pp. 767-779.
- 1355 Riddle, M.R., Aspiras, A.C., Gaudenz, K., Peuß, R., Sung, J.Y., Martineau, B., Peavey, M.,  
1356 Box, A.C., Tabin, J.A. & McGaugh, S. 2018, "Insulin resistance in cavefish as an  
1357 adaptation to a nutrient-limited environment", *Nature*, vol. 555, no. 7698, pp. 647-651.
- 1358 Rout, M.P. & Field, M.C. 2017, "The Evolution of Organellar Coat Complexes and  
1359 Organization of the Eukaryotic Cell", *Annual Review of Biochemistry*, vol. 86, pp. 637-  
1360 657.
- 1361 Seguin-Orlando, A., Korneliussen, T.S., Sikora, M., Malaspina, A.S., Manica, A., Moltke, I.,  
1362 Albrechtsen, A., Ko, A., Margaryan, A., Moiseyev, V., Goebel, T., Westaway, M.,  
1363 Lambert, D., Khartanovich, V., Wall, J.D., Nigst, P.R., Foley, R.A., Lahr, M.M., Nielsen,  
1364 R., Orlando, L. & Willerslev, E. 2014, "Paleogenomics. Genomic structure in Europeans  
1365 dating back at least 36,200 years", *Science (New York, N.Y.)*, vol. 346, no. 6213, pp.  
1366 1113-1118.

- 1367 Shahack-Gross, R., Berna, F., Karkanas, P., Lemorini, C., Gopher, A. & Barkai, R. 2014,  
1368 "Evidence for the repeated use of a central hearth at Middle Pleistocene (300 ky ago)  
1369 Qesem Cave, Israel", *Journal of archaeological science*, vol. 44, pp. 12-21.
- 1370 Shepherd, P.R. & Kahn, B.B. 1999, "Glucose transporters and insulin action—implications  
1371 for insulin resistance and diabetes mellitus", *New England journal of medicine*, vol. 341,  
1372 no. 4, pp. 248-257.
- 1373 Skoglund, P., Malmstrom, H., Omrak, A., Raghavan, M., Valdiosera, C., Gunther, T., Hall,  
1374 P., Tambets, K., Parik, J., Sjogren, K.G., Apel, J., Willerslev, E., Stora, J., Gotherstrom,  
1375 A. & Jakobsson, M. 2014, "Genomic diversity and admixture differs for Stone-Age  
1376 Scandinavian foragers and farmers", *Science (New York, N.Y.)*, vol. 344, no. 6185, pp.  
1377 747-750.
- 1378 Skoglund, P., Malmstrom, H., Raghavan, M., Stora, J., Hall, P., Willerslev, E., Gilbert, M.T.,  
1379 Gotherstrom, A. & Jakobsson, M. 2012, "Origins and genetic legacy of Neolithic farmers  
1380 and hunter-gatherers in Europe", *Science (New York, N.Y.)*, vol. 336, no. 6080, pp. 466-  
1381 469.
- 1382 Speir, M.L., Zweig, A.S., Rosenbloom, K.R., Raney, B.J., Paten, B., Nejad, P., Lee, B.T.,  
1383 Learned, K., Karolchik, D. & Hinrichs, A.S. 2015, "The UCSC genome browser  
1384 database: 2016 update", *Nucleic acids research*, vol. 44, no. D1, pp. D717-D725.
- 1385 Stöver, B.C. & Müller, K.F. 2010, "TreeGraph 2: combining and visualizing evidence from  
1386 different phylogenetic analyses", *BMC bioinformatics*, vol. 11, no. 1, pp. 7.
- 1387 Suyama, M., Torrents, D. & Bork, P. 2006, "PAL2NAL: robust conversion of protein  
1388 sequence alignments into the corresponding codon alignments", *Nucleic acids research*,  
1389 vol. 34, no. suppl\_2, pp. W609-W612.
- 1390 Tajima, F. 1989, "Statistical method for testing the neutral mutation hypothesis by DNA  
1391 polymorphism", *Genetics*, vol. 123, no. 3, pp. 585-595.
- 1392 Teixeira, J.C., de Filippo, C., Weihmann, A., Meneu, J.R., Racimo, F., Dannemann, M.,  
1393 Nickel, B., Fischer, A., Halbwax, M. & Andre, C. 2015, "Long-term balancing selection in

- 1394 LAD1 maintains a missense trans-species polymorphism in humans, chimpanzees, and  
1395 bonobos", *Molecular biology and evolution*, vol. 32, no. 5, pp. 1186-1196.
- 1396 Towler, M.C., Gleeson, P.A., Hoshino, S., Rahkila, P., Manalo, V., Ohkoshi, N., Ordahl, C.,  
1397 Parton, R.G. & Brodsky, F.M. 2004, "Clathrin isoform CHC22, a component of  
1398 neuromuscular and myotendinous junctions, binds sorting nexin 5 and has increased  
1399 expression during myogenesis and muscle regeneration", *Molecular biology of the cell*,  
1400 vol. 15, no. 7, pp. 3181-3185.
- 1401 Trefely, S., Khoo, P.S., Krycer, J.R., Chaudhuri, R., Fazakerley, D.J., Parker, B.L., Sultani,  
1402 G., Lee, J., Stephan, J.P., Torres, E., Jung, K., Kuijl, C., James, D.E., Junutula, J.R. &  
1403 Stockli, J. 2015, "Kinome Screen Identifies PFKFB3 and Glucose Metabolism as  
1404 Important Regulators of the Insulin/Insulin-like Growth Factor (IGF)-1 Signaling  
1405 Pathway", *The Journal of biological chemistry*, vol. 290, no. 43, pp. 25834-25846.
- 1406 Vassilopoulos, S., Esk, C., Hoshino, S., Funke, B.H., Chen, C.Y., Plocik, A.M., Wright, W.E.,  
1407 Kucherlapati, R. & Brodsky, F.M. 2009, "A role for the CHC22 clathrin heavy-chain  
1408 isoform in human glucose metabolism", *Science (New York, N.Y.)*, vol. 324, no. 5931,  
1409 pp. 1192-1196.
- 1410 Venkatesh, B., Lee, A.P., Ravi, V., Maurya, A.K., Lian, M.M., Swann, J.B., Ohta, Y., Flajnik,  
1411 M.F., Sutoh, Y. & Kasahara, M. 2014, "Elephant shark genome provides unique insights  
1412 into gnathostome evolution", *Nature*, vol. 505, no. 7482, pp. 174.
- 1413 Wakeham, D.E., Abi-Rached, L., Towler, M.C., Wilbur, J.D., Parham, P. & Brodsky, F.M.  
1414 2005, "Clathrin heavy and light chain isoforms originated by independent mechanisms  
1415 of gene duplication during chordate evolution", *Proceedings of the National Academy of  
1416 Sciences of the United States of America*, vol. 102, no. 20, pp. 7209-7214.
- 1417 Watterson, G. 1975, "On the number of segregating sites in genetical models without  
1418 recombination", *Theoretical population biology*, vol. 7, no. 2, pp. 256-276.
- 1419 Wilbur, J.D., Hwang, P.K. & Brodsky, F.M. 2005, "New faces of the familiar clathrin lattice",  
1420 *Traffic*, vol. 6, no. 4, pp. 346-350.

- 1421 Yang, Z. 2007, "PAML 4: phylogenetic analysis by maximum likelihood", *Molecular biology*  
1422 *and evolution*, vol. 24, no. 8, pp. 1586-1591.
- 1423 Yates, A., Akanni, W., Amode, M.R., Barrell, D., Billis, K., Carvalho-Silva, D., Cummins, C.,  
1424 Clapham, P., Fitzgerald, S., Gil, L., Giron, C.G., Gordon, L., Hourlier, T., Hunt, S.E.,  
1425 Janacek, S.H., Johnson, N., Juettemann, T., Keenan, S., Lavidas, I., Martin, F.J.,  
1426 Maurel, T., McLaren, W., Murphy, D.N., Nag, R., Nuhn, M., Parker, A., Patricio, M.,  
1427 Pignatelli, M., Rahtz, M., Riat, H.S., Sheppard, D., Taylor, K., Thormann, A., Vullo, A.,  
1428 Wilder, S.P., Zadissa, A., Birney, E., Harrow, J., Muffato, M., Perry, E., Ruffier, M.,  
1429 Spudich, G., Trevanion, S.J., Cunningham, F., Aken, B.L., Zerbino, D.R. & Flicek, P.  
1430 2016, "Ensembl 2016", *Nucleic acids research*, vol. 44, no. D1, pp. D710-6.
- 1431 Ybe, J.A., Brodsky, F.M., Hofmann, K., Lin, K., Liu, S., Chen, L., Earnest, T.N., Fletterick,  
1432 R.J. & Hwang, P.K. 1999, "Clathrin self-assembly is mediated by a tandemly repeated  
1433 superhelix", *Nature*, vol. 399, no. 6734, pp. 371-375.
- 1434 Yuan, Y., Zhang, P., Wang, K., Liu, M., Li, J., Zheng, J., Wang, D., Xu, W., Lin, M. & Dong,  
1435 L. 2018, "Genome Sequence of the Freshwater Yangtze Finless Porpoise", *Genes*, vol.  
1436 9, no. 4, pp. 213.
- 1437

- sequence
- divergent sequence
- ★ loss event
- duplication

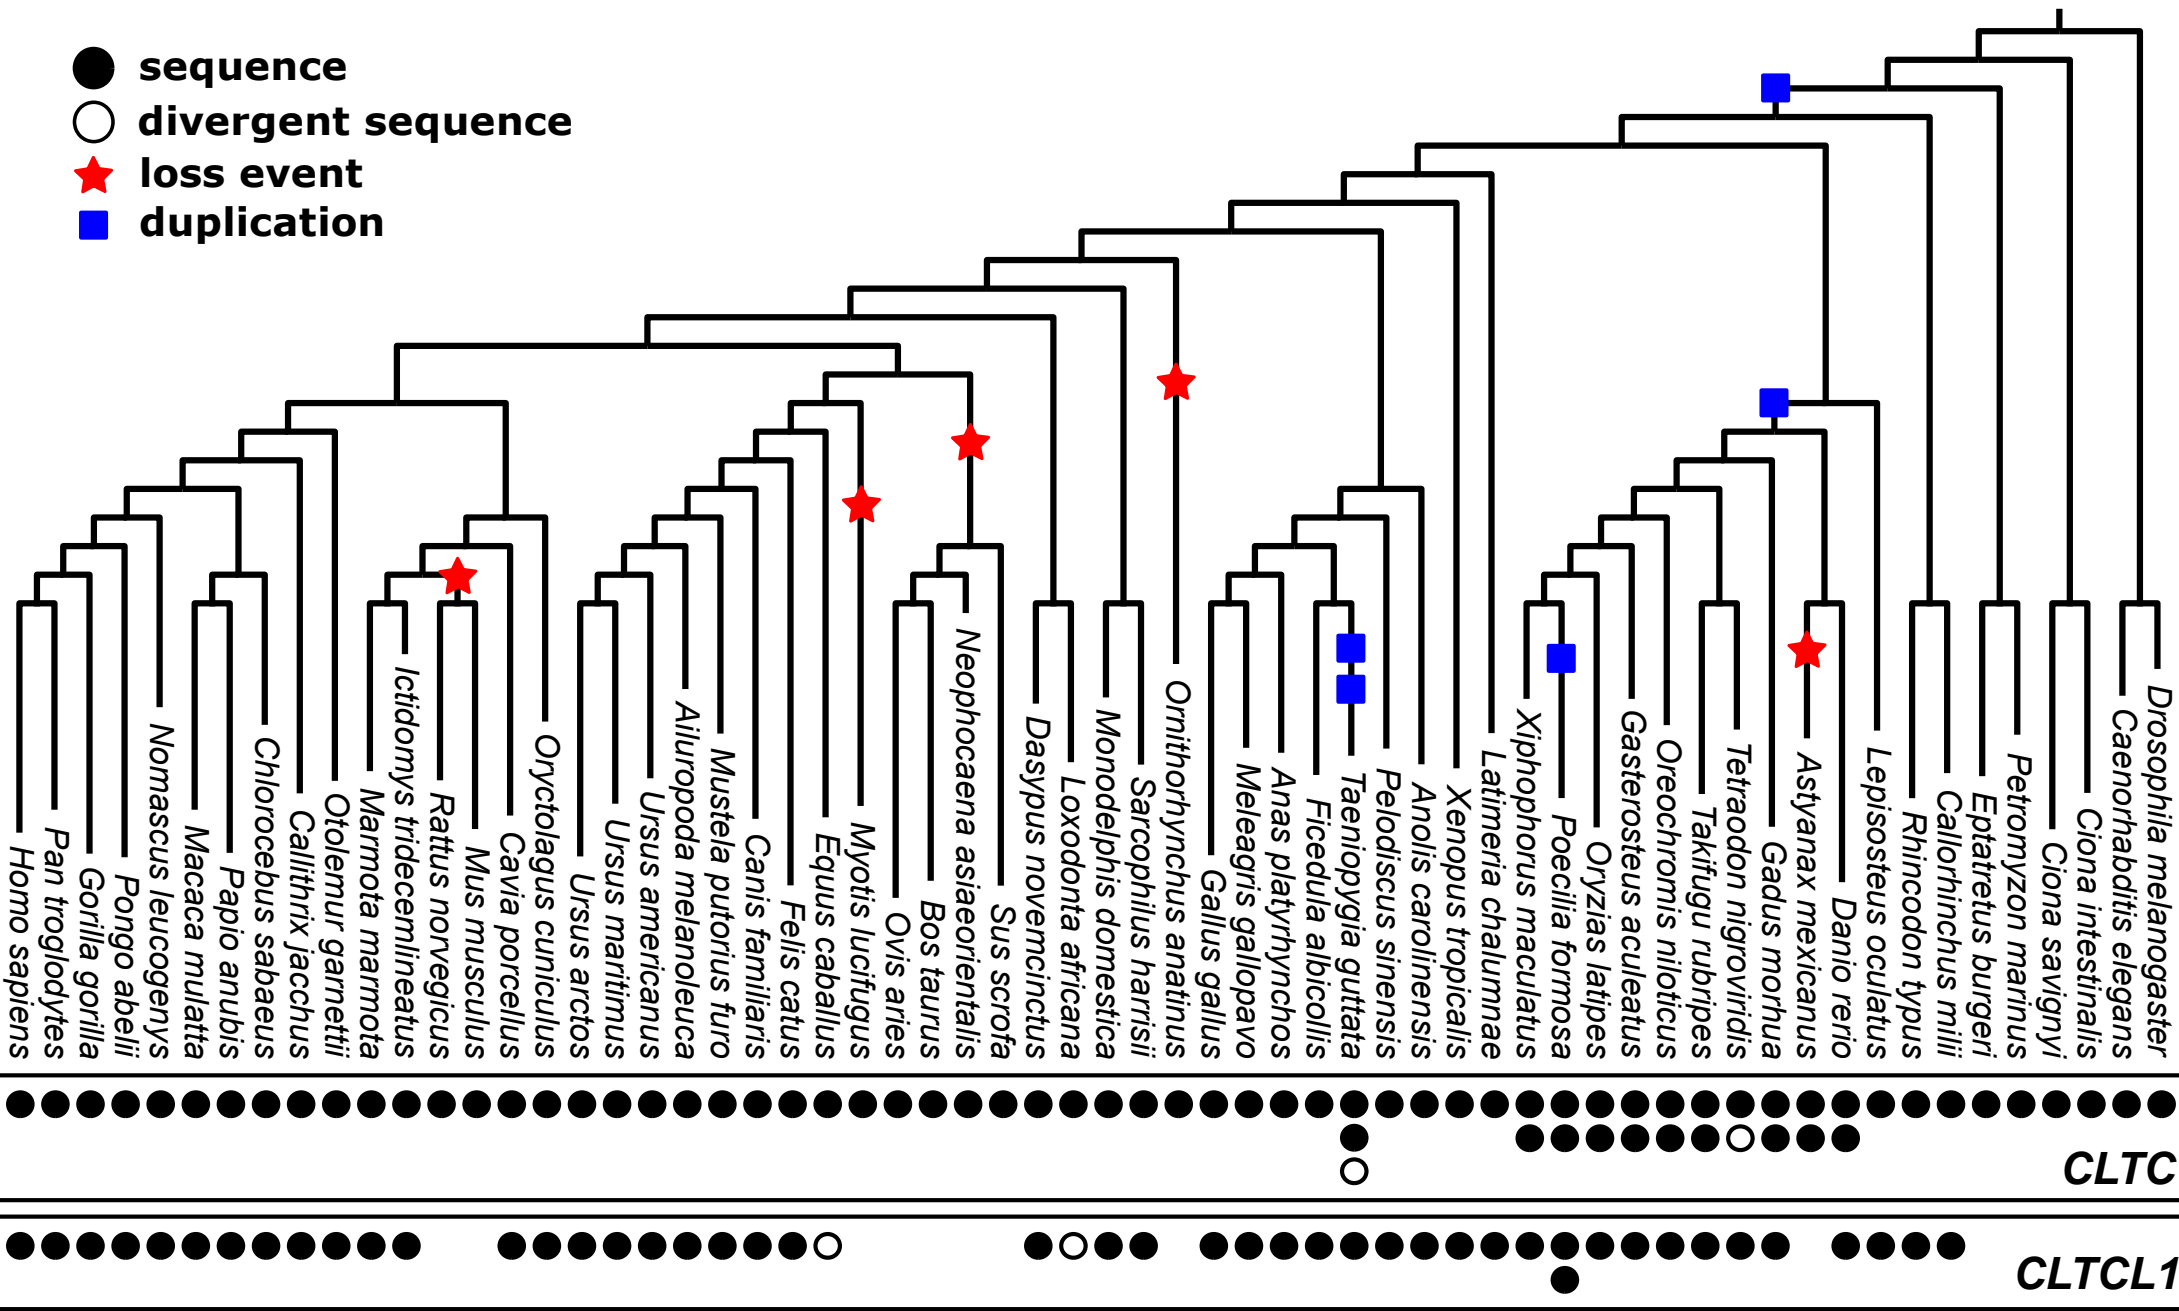

**A**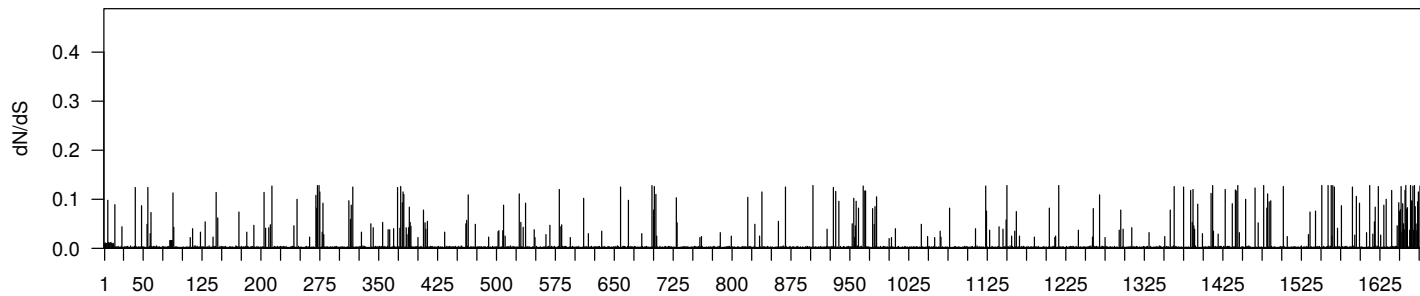**B**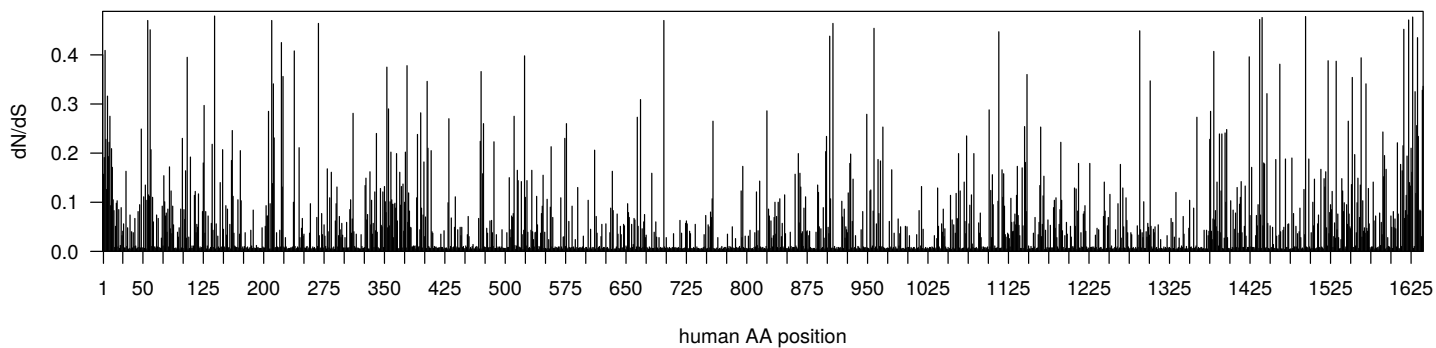**C**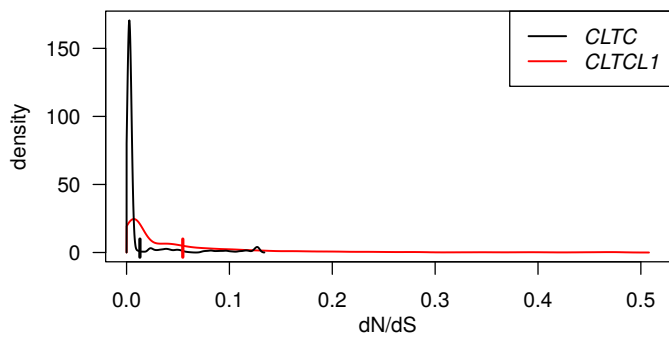**D**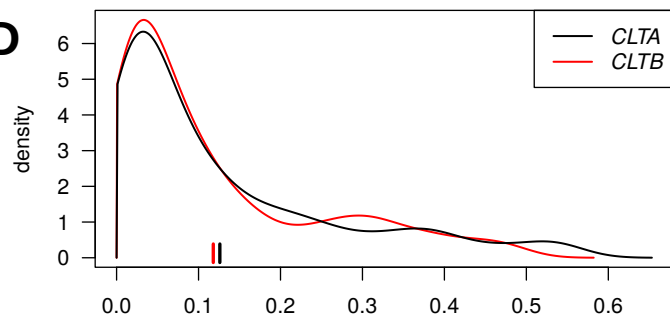**E**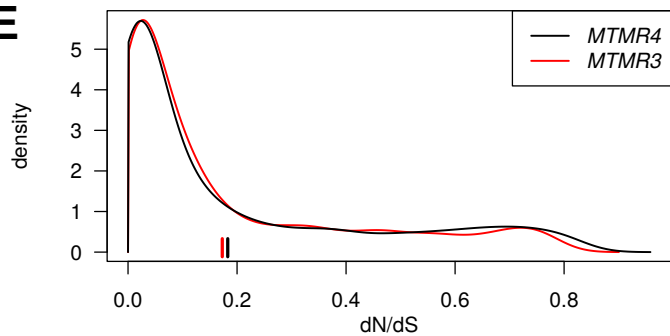

**A****CLTC**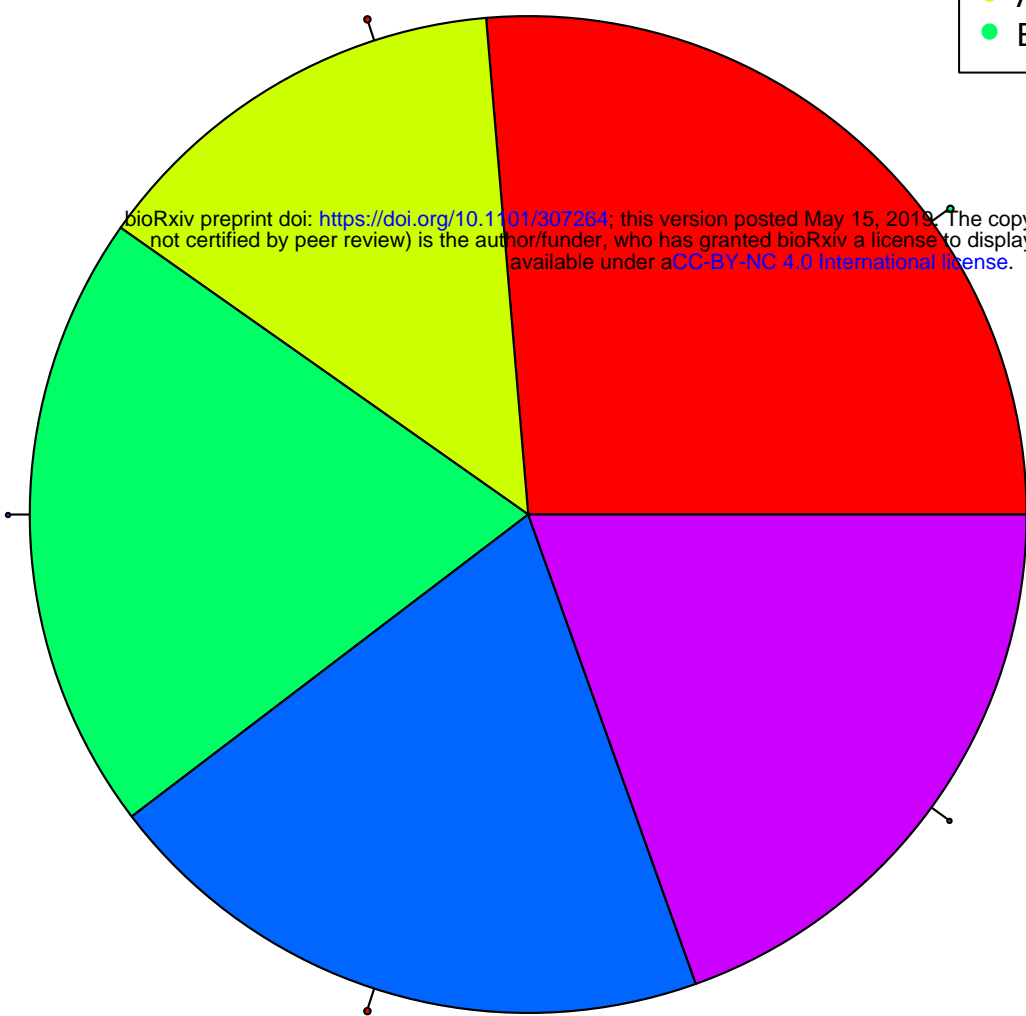**B****CLTCL1**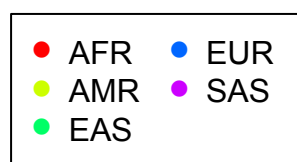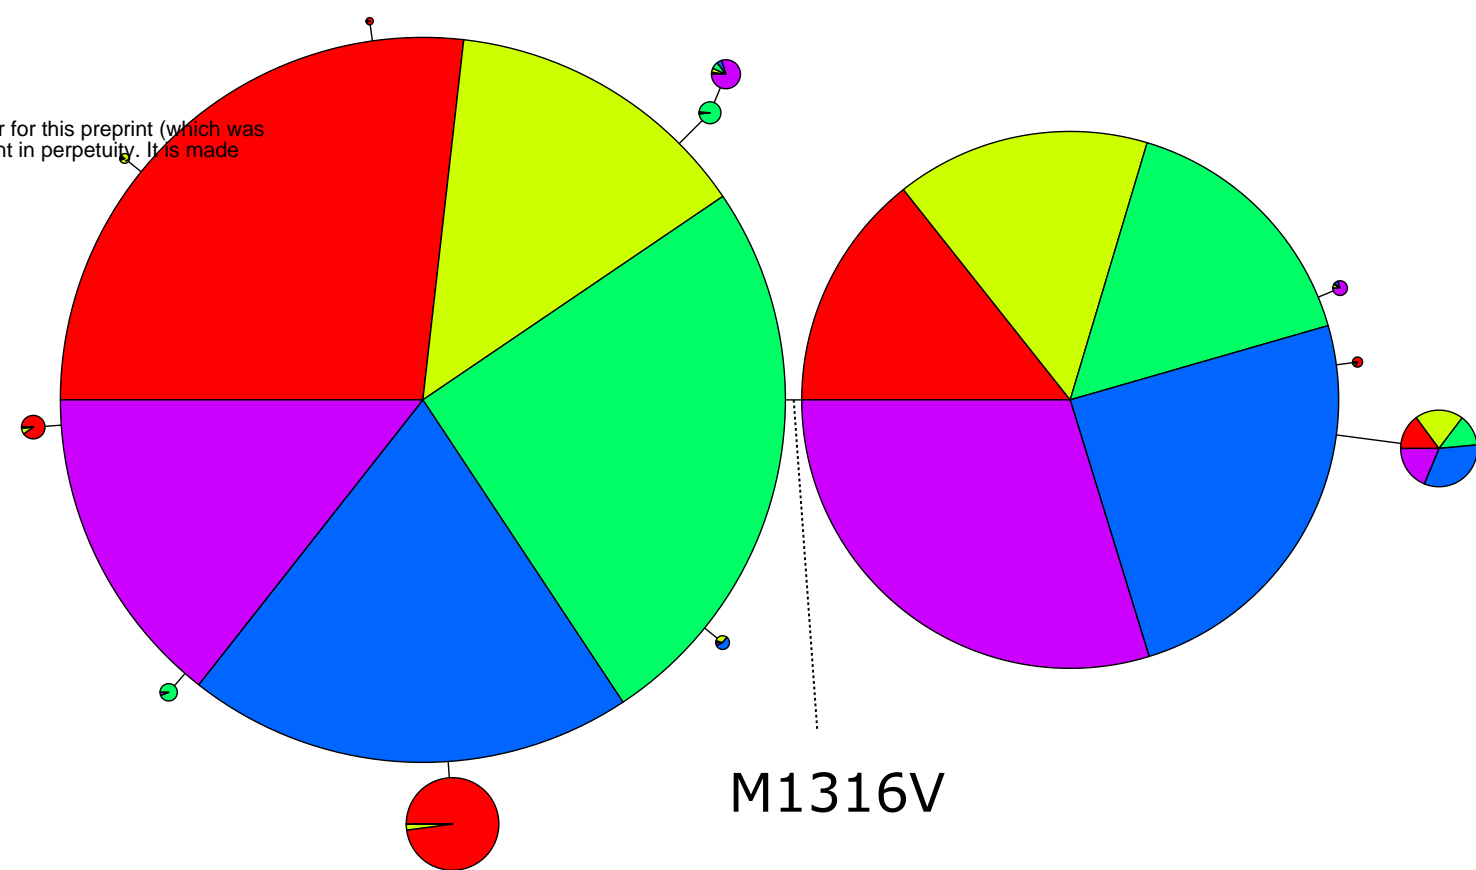**C****CLTC**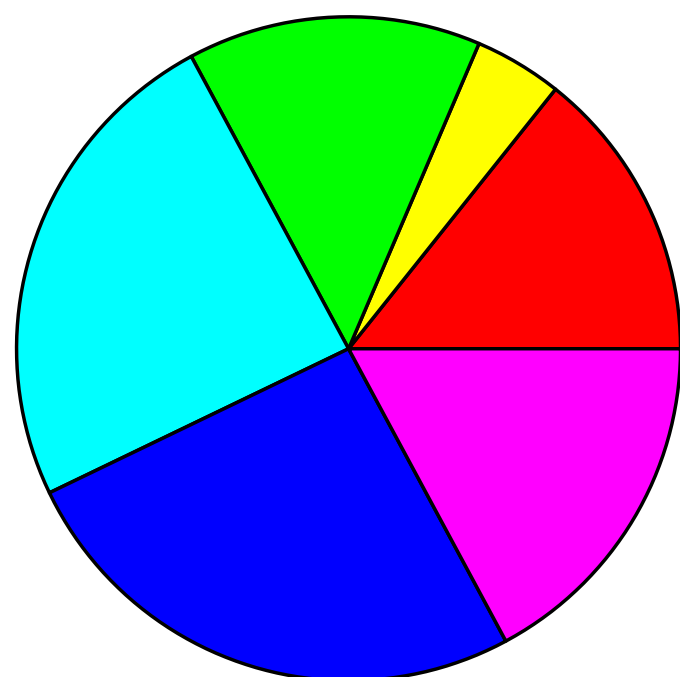**D****CLTCL1**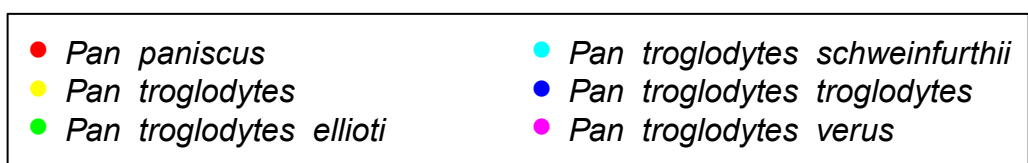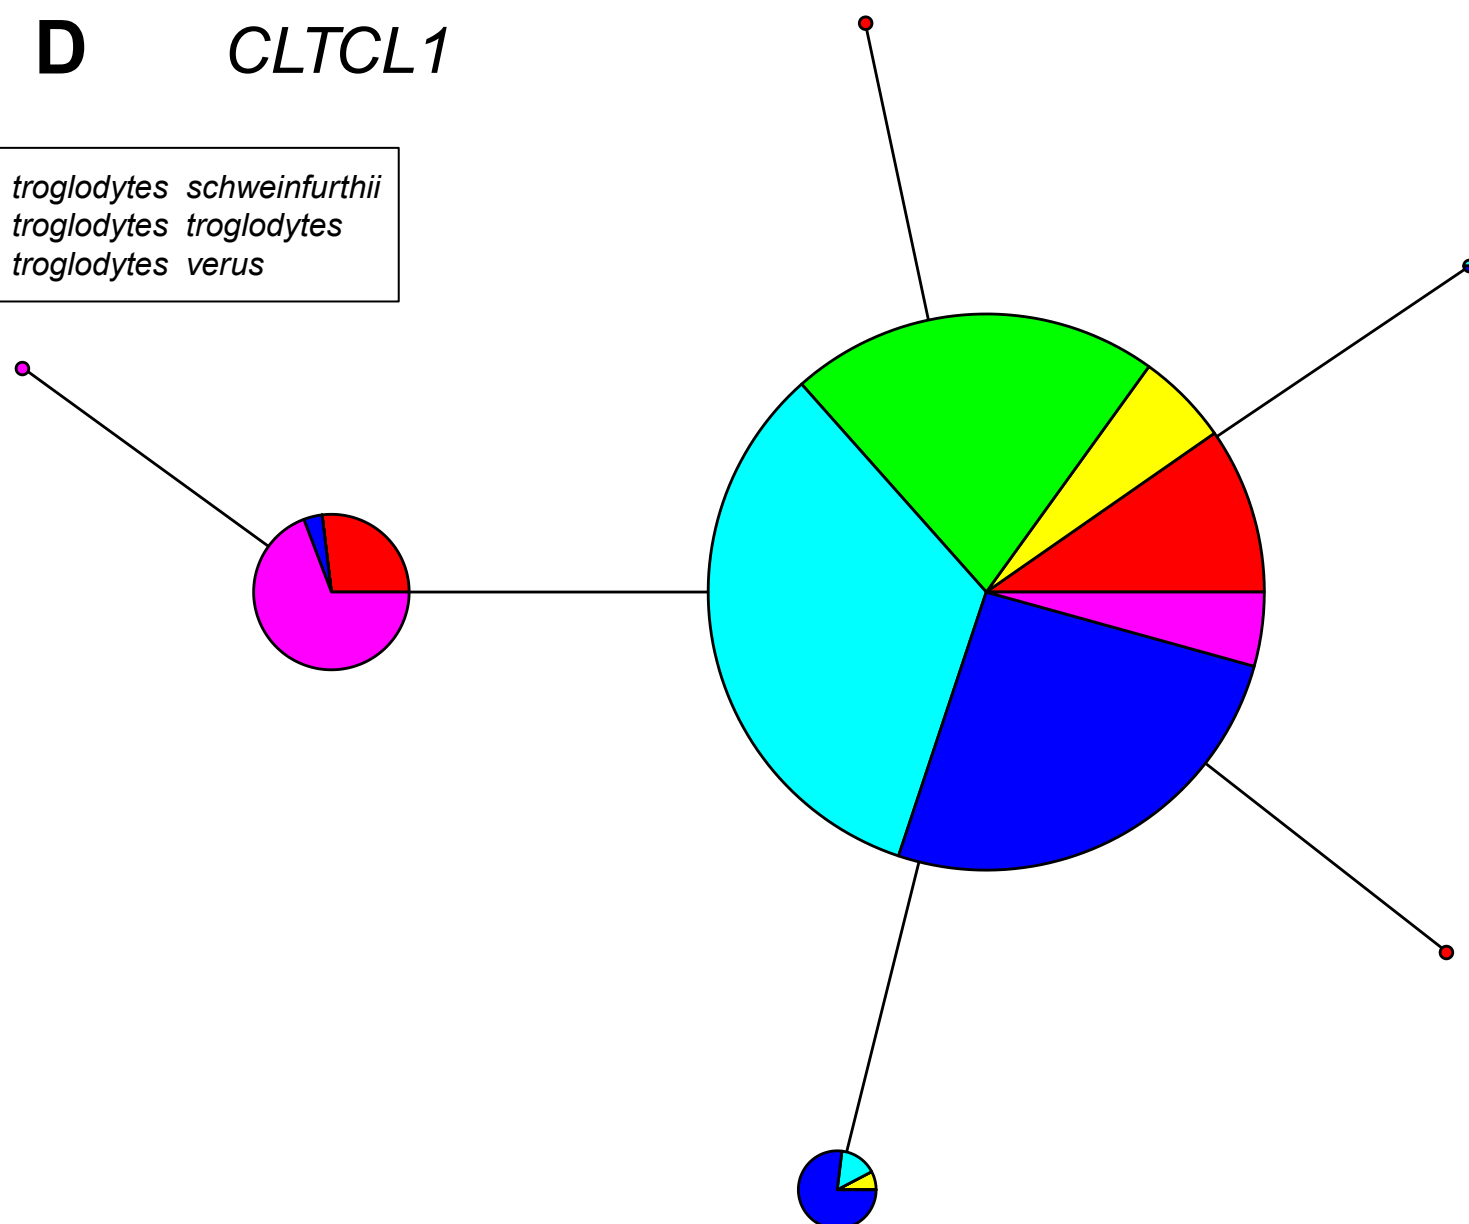



# Summary statistics of genetic diversity

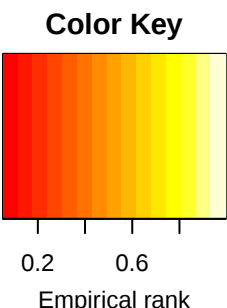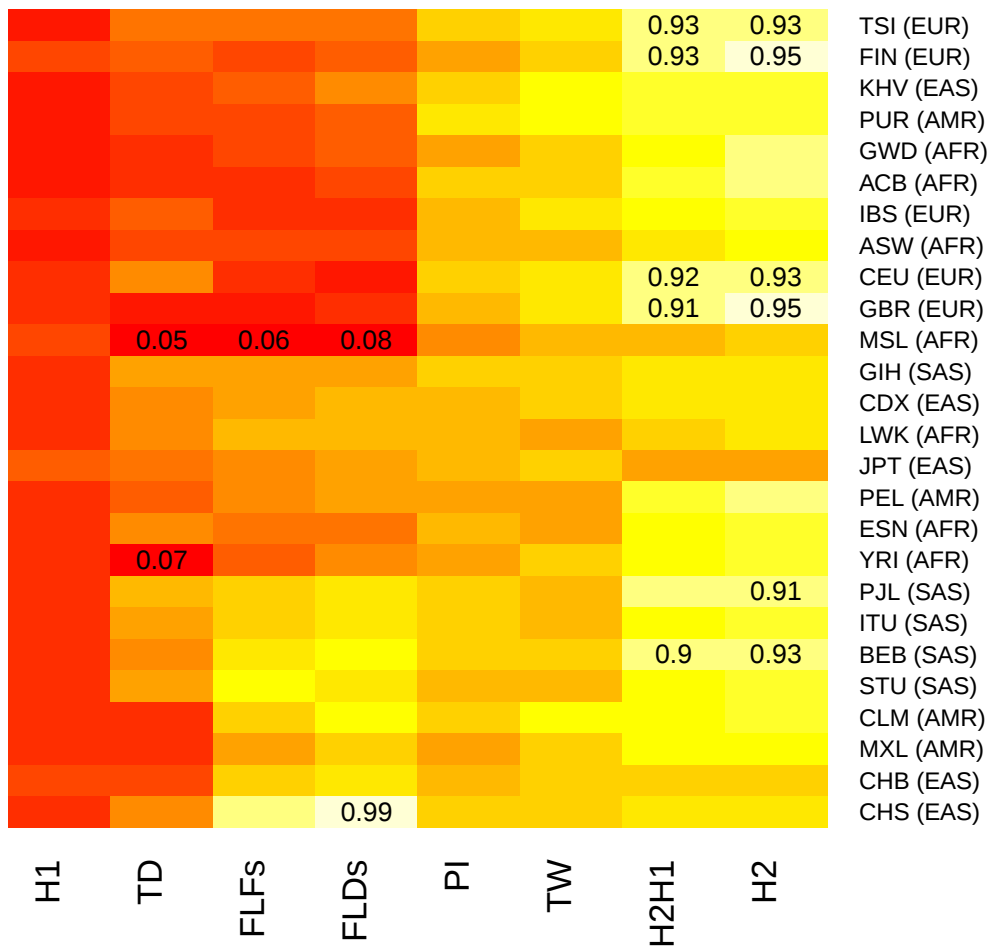

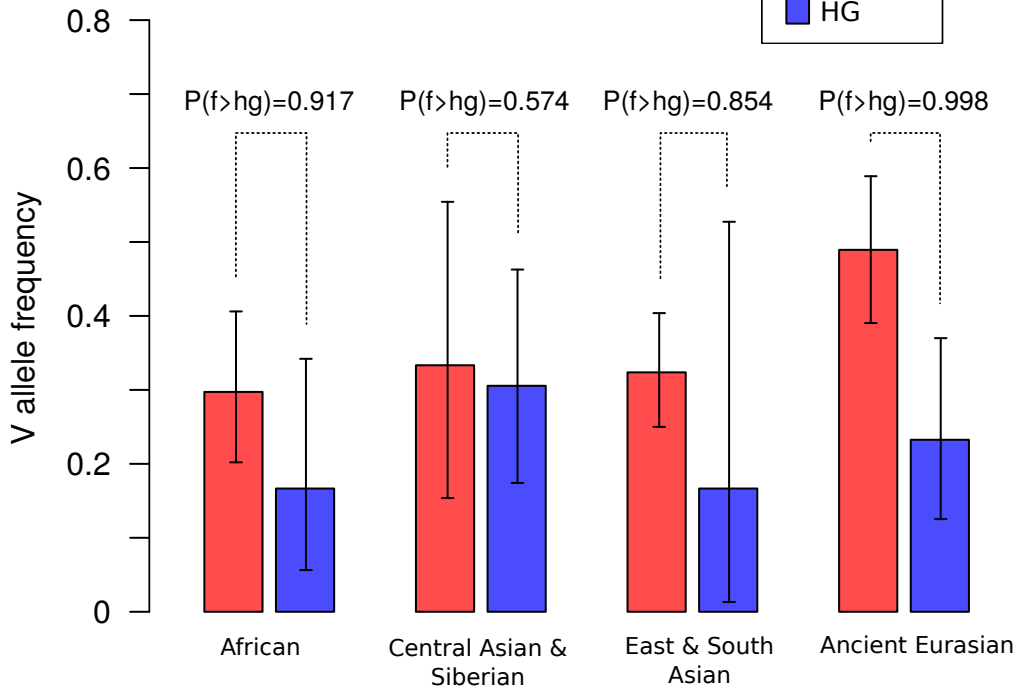

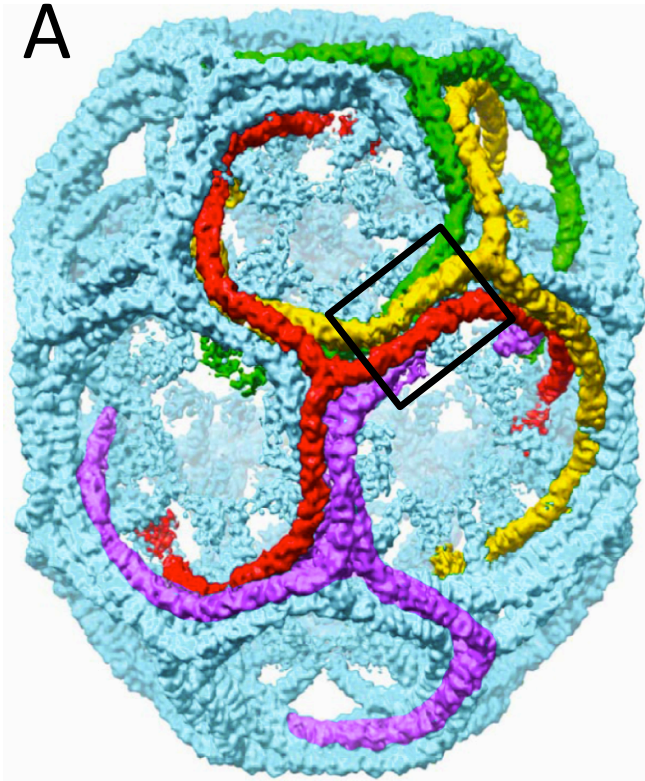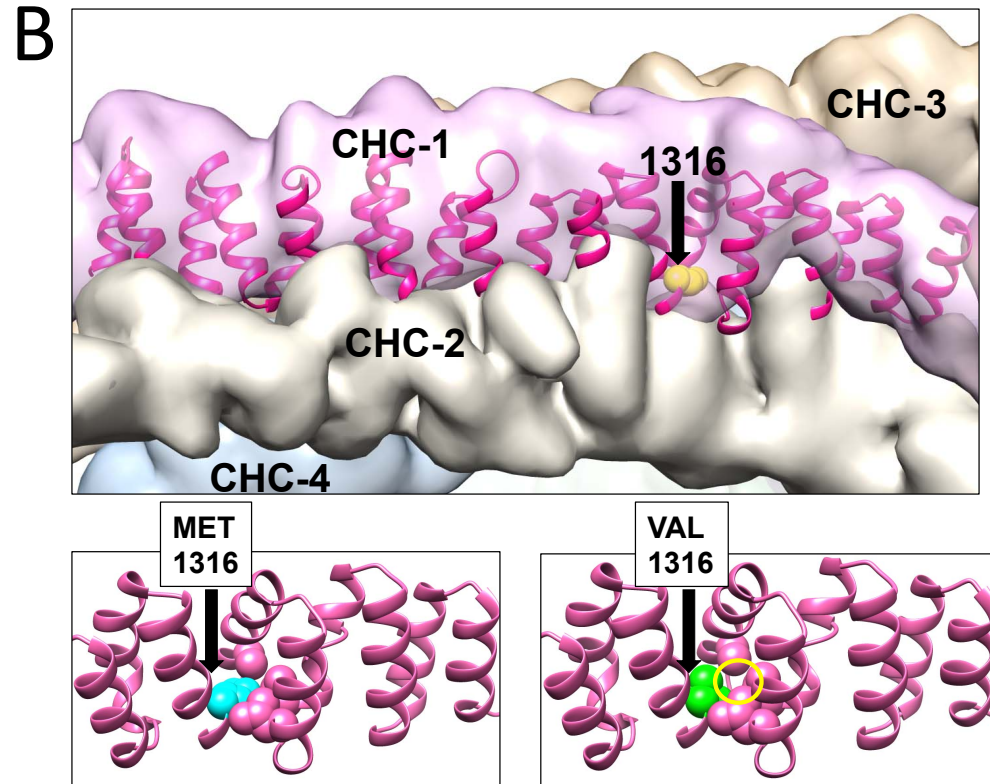

**A**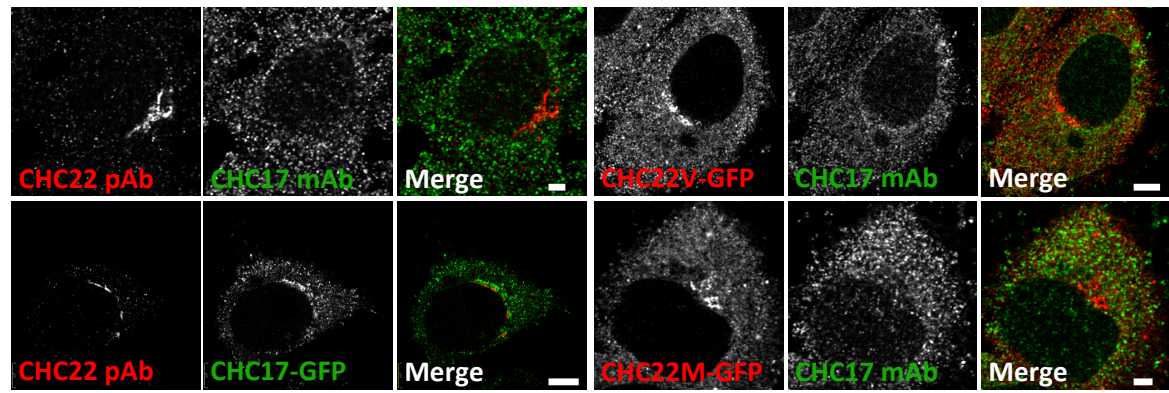**B**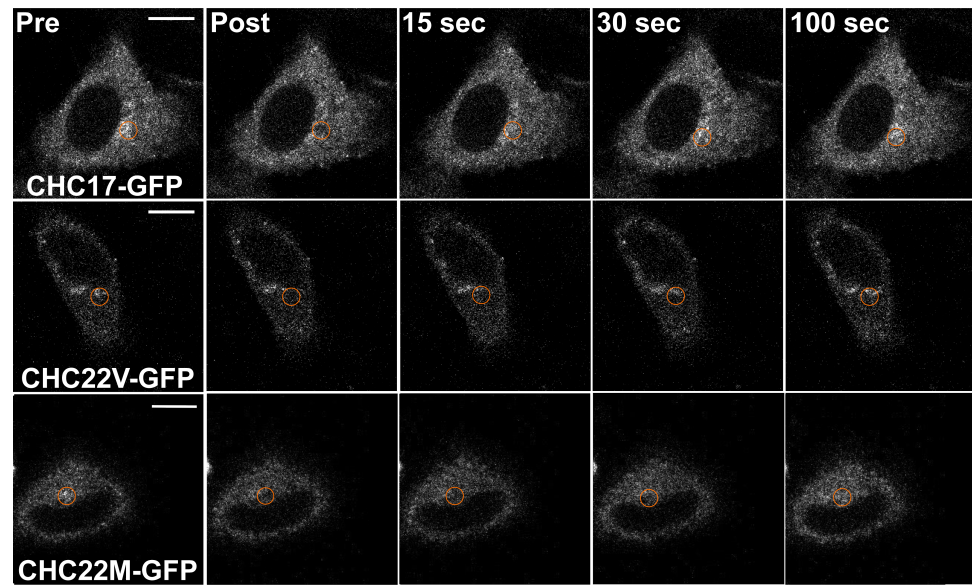**C**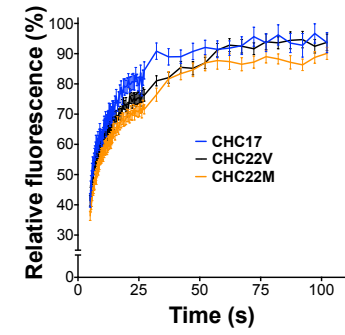**D**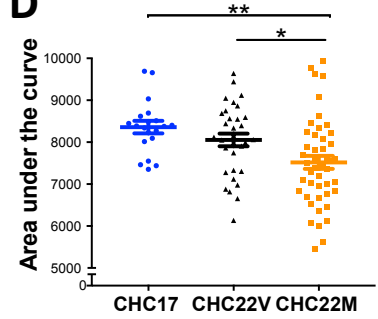**E**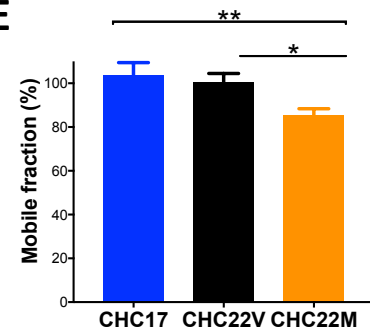

**A**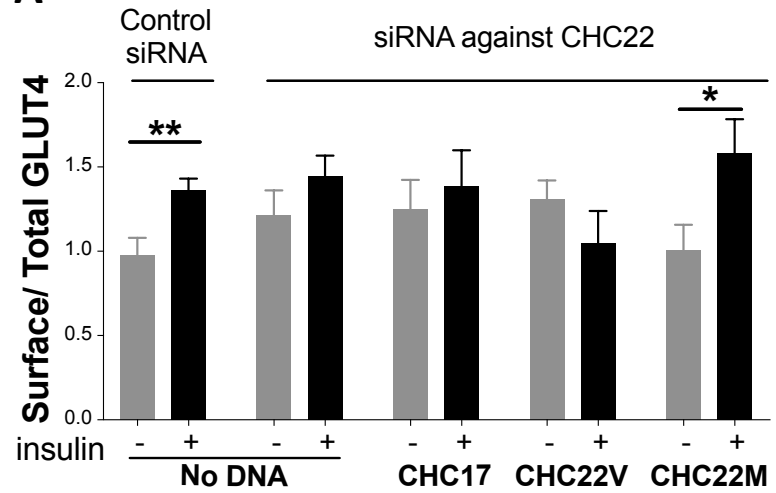**B**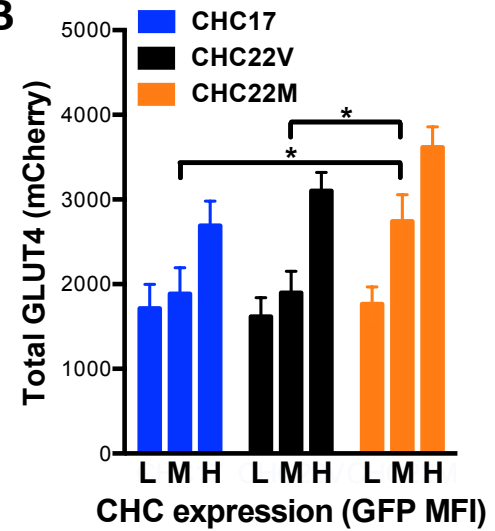

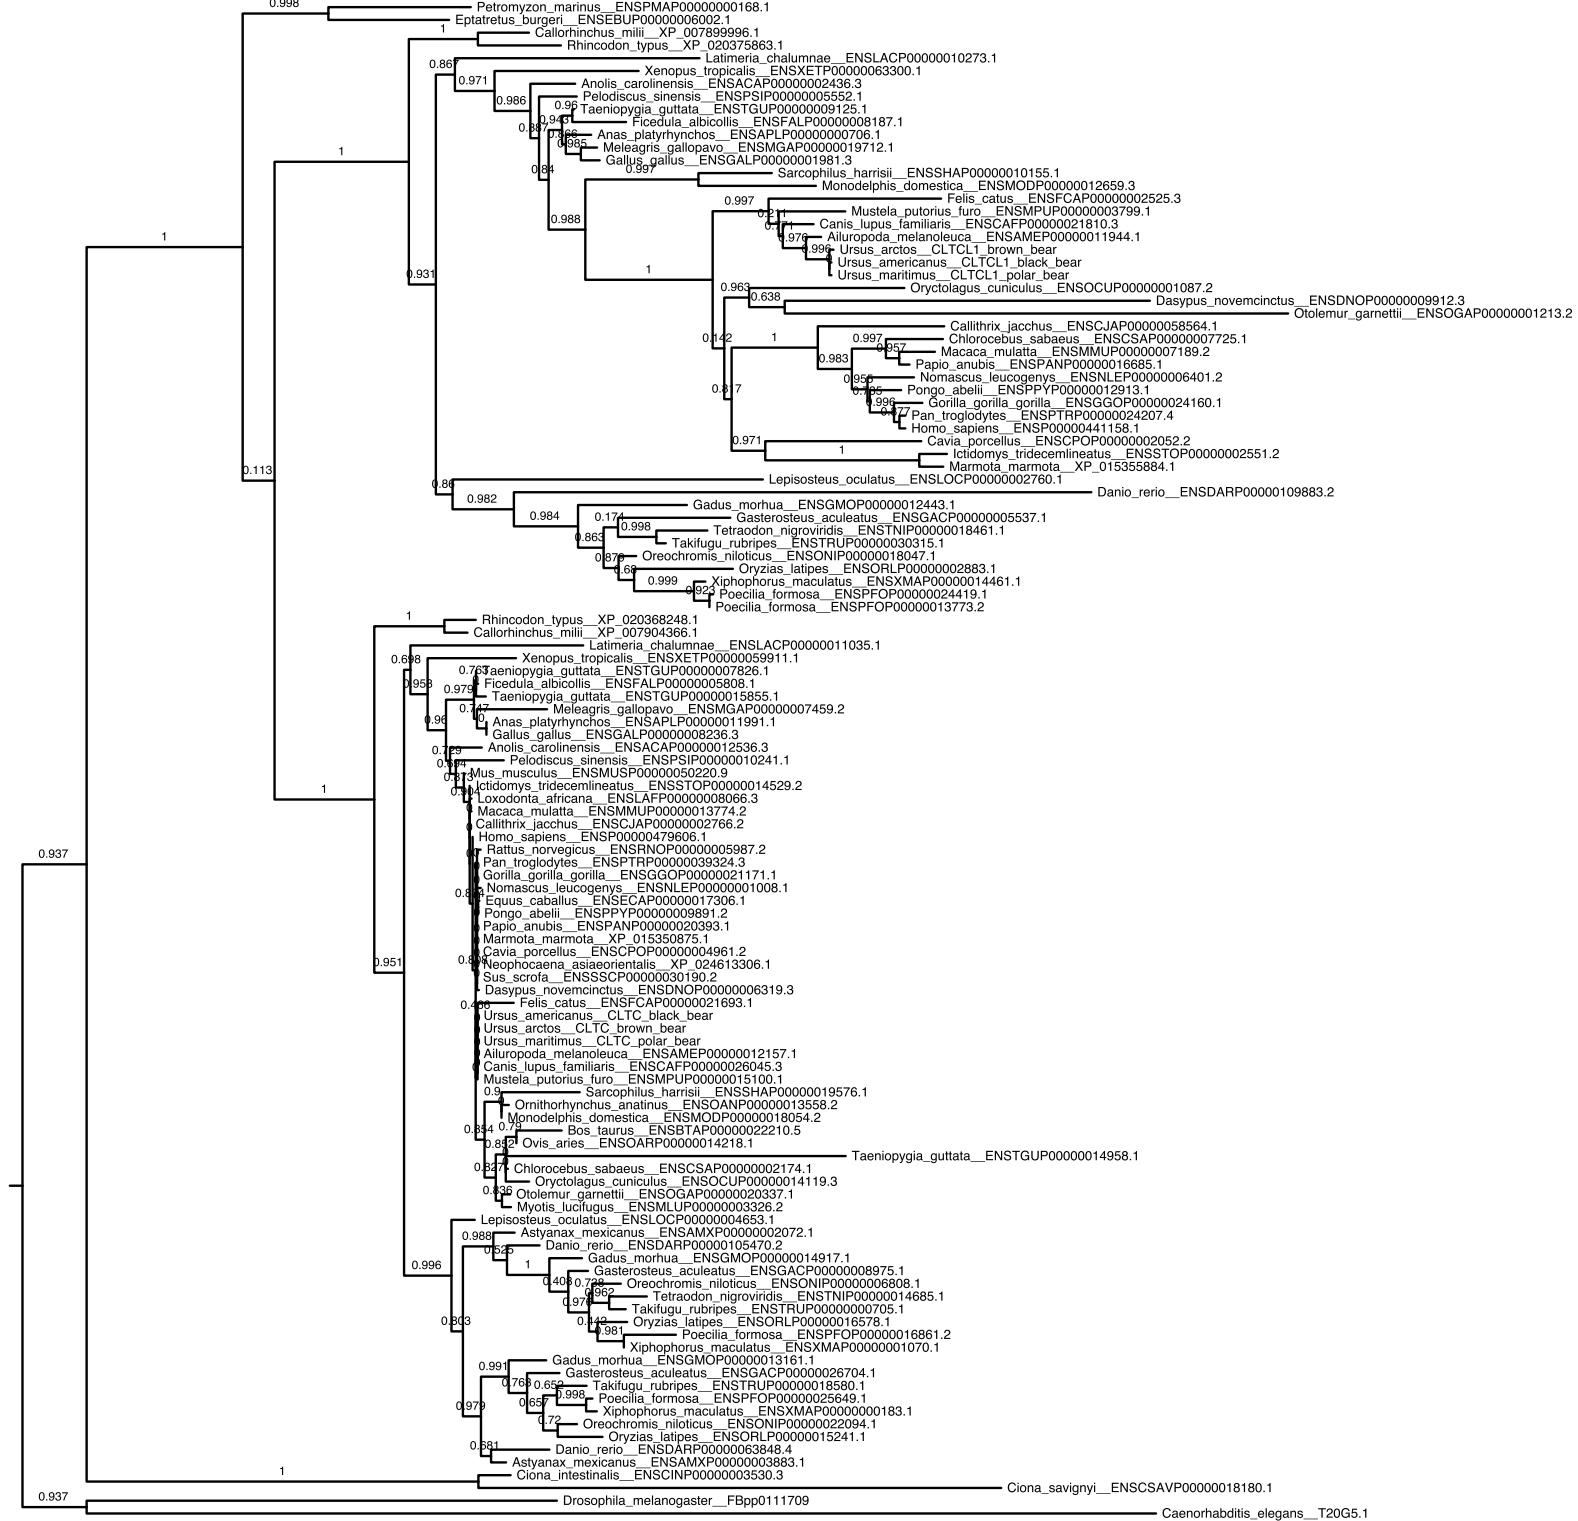

# CLTC

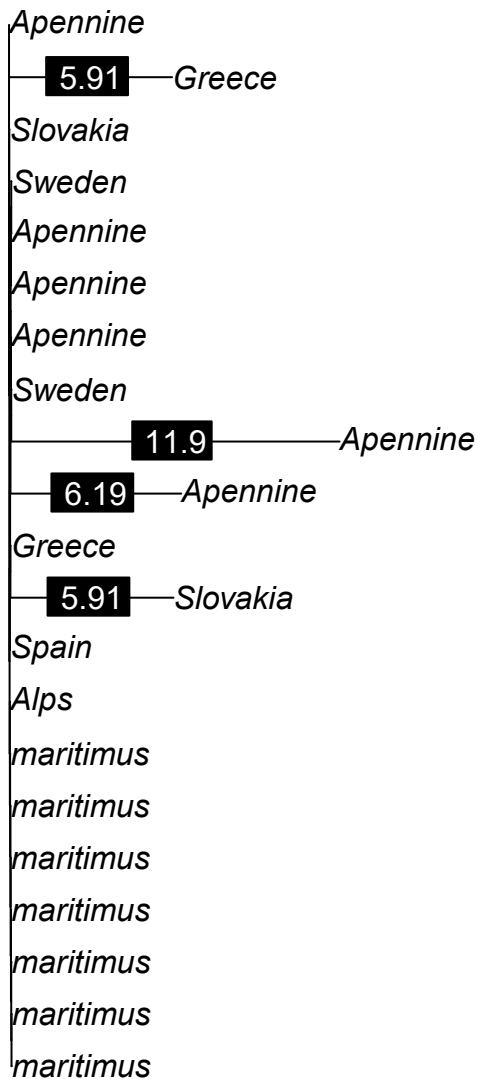

# CLTCL1

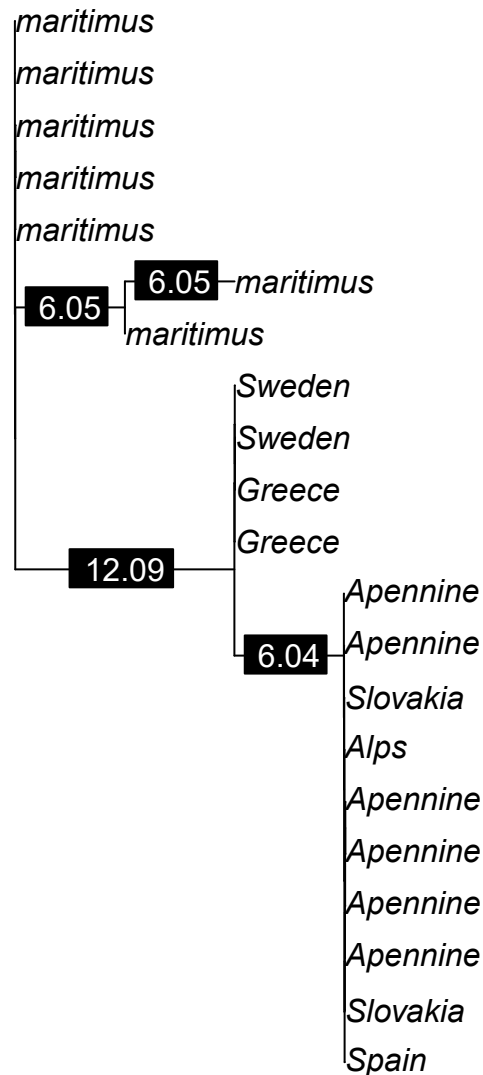



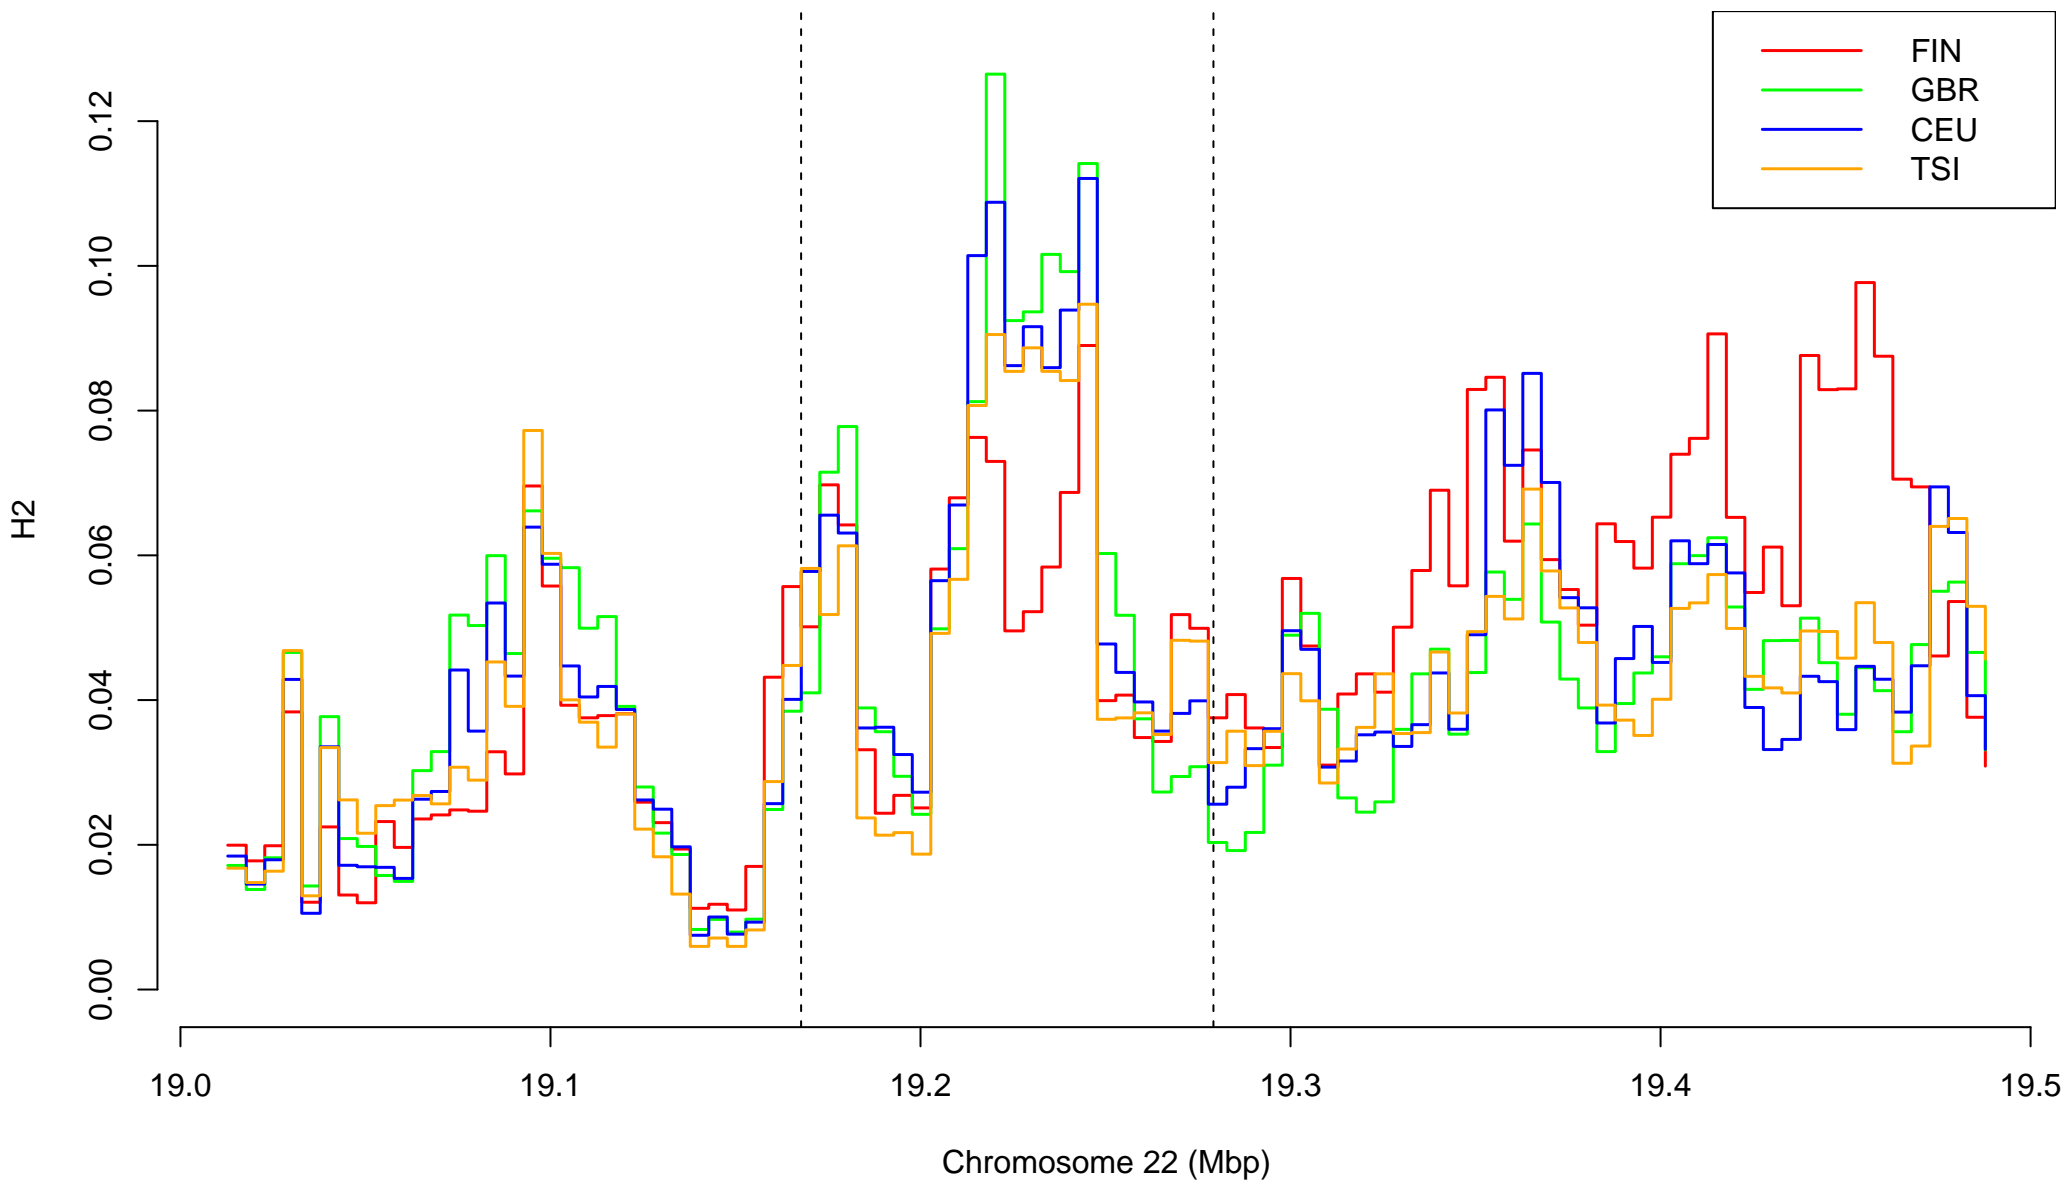



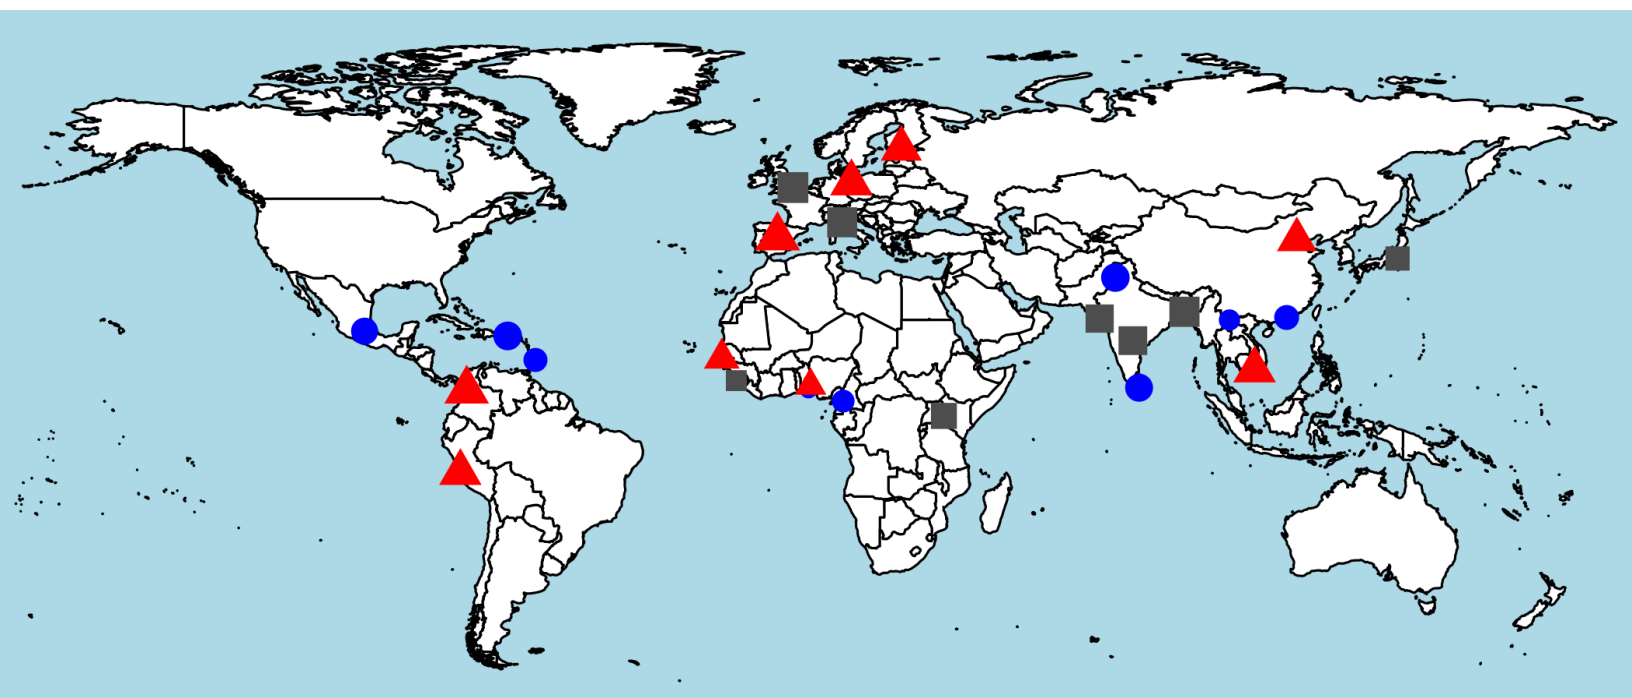

Source: https://www.biorxiv.org/content/biorxiv/early/2019/05/15/307264.full.pdf
